# Supplementary material for: DNA Methylation Patterns in CD8+ T Cells Discern Psoriasis From Psoriatic Arthritis and Correlate With Cutaneous Disease Activity
Source: Front Cell Dev Biol. 2021 Oct 21;9:746145. doi: 10.3389/fcell.2021.746145 (PMC8567019; doi:10.3389/fcell.2021.746145)
Supplement: Supplementary file 1 [file Table_1.XLSX]

## Sheet: Sheet1
Supplementary Table 1: Gene onthology analysis of DMPs in promoters and gene bodies of PsA patients and healthy
ID	ONTOLOGY	Description	GeneRatio	BgRatio	pvalue	p.adjust	qvalue	geneID	Count
GO:0050808	BP	synapse organization	47/844	433/18866	1,8966161761155e-08	9,75240037758588e-05	9,01990724598928e-05	1496/221935/266727/7474/9863/64084/80823/3084/266743/6092/22997/831/9378/5364/6622/60/3586/10013/5747/8495/23767/10397/5978/56850/84189/1740/1488/57549/6792/2239/22871/56098/8541/9419/10810/1140/8321/4644/2561/2823/54583/27185/2596/153090/2743/5098/5789	47
GO:0034329	BP	cell junction assembly	42/844	434/18866	2,33800213727895e-06	0,00601100349494419	0,00555952297696122	221935/10395/266727/7474/9863/64084/80823/3084/266743/8642/6092/287/9378/5583/5364/6622/60/56288/143162/5747/261734/23767/50848/4088/857/84189/3678/84552/6904/2239/22871/24146/10391/83700/342184/8321/2561/2823/2596/7145/2316/5789	42
GO:0001764	BP	neuron migration	22/844	164/18866	4,13213715647383e-06	0,00708248308619615	0,00655052479752589	1496/9181/23314/266727/57556/3084/26053/4147/26468/5747/7531/29967/5592/1600/6792/474/2823/10806/27185/153090/460/2316	22
GO:0098742	BP	cell-cell adhesion via plasma-membrane adhesion molecules	29/844	277/18866	1,98856501266744e-05	0,0255630032378399	0,0236429913874513	221935/266727/64084/8642/6092/22997/56108/9378/56113/3683/3586/64072/152404/23022/1012/65125/23767/56099/1600/3678/57549/6091/2239/22871/56098/24146/5098/5789/1002	29
GO:0007416	BP	synapse assembly	22/844	184/18866	2,63891078686948e-05	0,0271385585321658	0,0251002082843712	221935/266727/7474/9863/64084/80823/3084/266743/6092/9378/5364/6622/5747/23767/84189/2239/22871/8321/2561/2823/2596/5789	22
GO:0050807	BP	regulation of synapse organization	25/844	229/18866	3,6483160514515e-05	0,0312660685609393	0,0289177051236103	1496/266727/7474/64084/80823/6092/9378/6622/3586/5747/23767/56850/84189/57549/6792/2239/22871/9419/8321/2823/54583/27185/2596/153090/5789	25
GO:0042472	BP	inner ear morphogenesis	15/844	103/18866	5,2514692659124e-05	0,0373640274129987	0,0345576523269521	55636/7474/80736/10083/2253/79955/84189/5076/8013/474/161497/29/2263/9132/7020	15
GO:0070933	BP	histone H4 deacetylation	5/844	11/18866	6,52931574440395e-05	0,0373640274129987	0,0345576523269521	9759/5978/3065/9734/55869	5
GO:0050803	BP	regulation of synapse structure or activity	25/844	240/18866	7,89741491888652e-05	0,0373640274129987	0,0345576523269521	1496/266727/7474/64084/80823/6092/9378/6622/3586/5747/23767/56850/84189/57549/6792/2239/22871/9419/8321/2823/54583/27185/2596/153090/5789	25
GO:0051963	BP	regulation of synapse assembly	15/844	107/18866	8,21617251211588e-05	0,0373640274129987	0,0345576523269521	266727/7474/64084/80823/6092/9378/6622/5747/23767/84189/2239/22871/8321/2596/5789	15
GO:0042177	BP	negative regulation of protein catabolic process	17/844	133/18866	9,25503992822248e-05	0,0373640274129987	0,0345576523269521	7327/1956/7077/3084/56658/51322/6622/3586/5270/4088/2903/9529/4534/27248/153090/2316/7874	17
GO:1901888	BP	regulation of cell junction assembly	22/844	200/18866	9,38534935793859e-05	0,0373640274129987	0,0345576523269521	10395/266727/7474/64084/80823/6092/9378/5583/6622/5747/261734/23767/50848/4088/857/84189/2239/22871/342184/8321/2596/5789	22
GO:0030198	BP	extracellular matrix organization	35/844	395/18866	9,85051366752434e-05	0,0373640274129987	0,0345576523269521	9509/7077/8728/64093/2296/56999/165/55612/2113/1278/7148/1293/3683/1277/81792/256764/56547/5747/4629/1299/5345/50848/4088/7045/857/1545/3678/7490/64094/171019/60495/5054/83700/4017/255631	35
GO:0043062	BP	extracellular structure organization	35/844	396/18866	0,000103551815815829	0,0373640274129987	0,0345576523269521	9509/7077/8728/64093/2296/56999/165/55612/2113/1278/7148/1293/3683/1277/81792/256764/56547/5747/4629/1299/5345/50848/4088/7045/857/1545/3678/7490/64094/171019/60495/5054/83700/4017/255631	35
GO:0021884	BP	forebrain neuron development	7/844	26/18866	0,000108996579384477	0,0373640274129987	0,0345576523269521	7474/6092/26468/2253/6091/2263/27185	7
GO:1905606	BP	regulation of presynapse assembly	8/844	35/18866	0,000124423600940483	0,037648424081512	0,0348206882434177	266727/9378/6622/84189/2239/22871/8321/5789	8
GO:0007409	BP	axonogenesis	40/844	482/18866	0,000134663741442235	0,037648424081512	0,0348206882434177	1496/51199/203228/7474/57556/3475/6092/2885/26053/4147/9378/399/5364/134430/60/22906/9046/10013/56288/23022/5747/23767/6586/10716/2253/84189/1600/57549/6792/6091/5076/8013/474/2674/4803/2263/6474/27185/2596/1002	40
GO:0048568	BP	embryonic organ development	38/844	451/18866	0,000144388307865084	0,037648424081512	0,0348206882434177	84678/26146/55636/23314/1956/7474/2296/2885/80736/3232/3586/10083/5914/2778/8854/5087/4088/10716/2253/79955/84189/3235/5079/388591/79733/5076/8013/474/161497/29/2263/5426/6474/54583/25949/9132/7020/7173	38
GO:0016570	BP	histone modification	39/844	468/18866	0,00014924339942732	0,037648424081512	0,0348206882434177	84678/29128/63925/4000/51322/1386/26053/23133/64754/6622/26038/9759/3141/10013/10600/79813/9810/9329/5978/54496/3065/5079/672/9643/377630/56341/90665/9734/55683/122953/408/80314/8284/55929/1487/51773/7404/7874/55869	39
GO:0050769	BP	positive regulation of neurogenesis	40/844	485/18866	0,000153488527232222	0,037648424081512	0,0348206882434177	51199/9181/7077/57118/7474/57556/9863/80823/114804/6092/63925/5583/5364/6457/22906/3232/84504/5914/5270/27339/100132074/5978/22849/3065/1600/10215/6792/6091/22871/474/4803/411/8321/57154/6474/27185/153090/2316/5789/1002	40
GO:0099174	BP	regulation of presynapse organization	8/844	36/18866	0,000153756691114693	0,037648424081512	0,0348206882434177	266727/9378/6622/84189/2239/22871/8321/5789	8
GO:0048736	BP	appendage development	20/844	181/18866	0,000180791549059374	0,0388722530653944	0,0359525966446502	26146/55636/7474/64093/23288/7704/5914/2778/8854/5087/2253/6910/3065/3235/5066/51222/342184/2263/6474/7020	20
GO:0060173	BP	limb development	20/844	181/18866	0,000180791549059374	0,0388722530653944	0,0359525966446502	26146/55636/7474/64093/23288/7704/5914/2778/8854/5087/2253/6910/3065/3235/5066/51222/342184/2263/6474/7020	20
GO:0099560	BP	synaptic membrane adhesion	7/844	28/18866	0,000181434086652949	0,0388722530653944	0,0359525966446502	266727/22997/9378/23767/2239/22871/5789	7
GO:0042611	CC	MHC protein complex	8/875	25/19559	8,51708396857032e-06	0,00408532561254544	0,00356465801150349	3105/3135/3106/3111/3134/3107/3123/3119	8
GO:0098576	CC	lumenal side of membrane	9/875	36/19559	2,17806791799573e-05	0,00408532561254544	0,00356465801150349	622/3105/3135/3106/3134/3107/3123/81502/3119	9
GO:0071556	CC	integral component of lumenal side of endoplasmic reticulum membrane	8/875	29/19559	2,88206392419431e-05	0,00408532561254544	0,00356465801150349	3105/3135/3106/3134/3107/3123/81502/3119	8
GO:0098553	CC	lumenal side of endoplasmic reticulum membrane	8/875	29/19559	2,88206392419431e-05	0,00408532561254544	0,00356465801150349	3105/3135/3106/3134/3107/3123/81502/3119	8
GO:0098978	CC	glutamatergic synapse	33/875	361/19559	8,59986397494309e-05	0,00975224574758547	0,00850933909099632	9181/7474/64084/3084/9378/60/6457/814/146395/23767/7531/10397/56850/2903/1740/1488/163/6792/3356/2239/22871/8541/10810/29/148281/4644/2823/54583/1487/9127/2316/5789/6511	33
GO:0097060	CC	synaptic membrane	34/875	387/19559	0,00014602242417269	0,0125373532097248	0,0109394894803131	1496/83590/57528/64084/22997/287/9378/23017/9568/146395/23767/3778/57537/1145/3760/2903/1740/5138/3356/2239/22871/9123/1140/286/408/148281/2561/2559/2823/9127/2743/6511/2891/23345	34
GO:0045211	CC	postsynaptic membrane	27/875	280/19559	0,000154782138391664	0,0125373532097248	0,0109394894803131	1496/83590/57528/64084/22997/287/23017/9568/146395/23767/3778/57537/1145/2903/1740/3356/22871/9123/1140/286/408/2561/2559/9127/2743/2891/23345	27
GO:0060076	CC	excitatory synapse	9/875	52/19559	0,000448258575696689	0,0304821178961569	0,0265972253062169	1496/152404/23022/3760/22871/9123/2263/9127/2891	9
GO:0000118	CC	histone deacetylase complex	11/875	77/19559	0,000605090947381458	0,0304821178961569	0,0265972253062169	23314/473/26038/9759/10013/3065/90665/9734/8204/55929/55869	11
GO:0070160	CC	tight junction	15/875	129/19559	0,000657185743594348	0,0304821178961569	0,0265972253062169	9181/9863/60/56288/143162/261734/55691/50848/595/84552/6904/23150/24146/83700/55114	15
GO:0031430	CC	M band	6/875	25/19559	0,000671395965837877	0,0304821178961569	0,0265972253062169	342527/287/84033/9172/2023/286	6
GO:0043296	CC	apical junction complex	16/875	143/19559	0,000675775511783671	0,0304821178961569	0,0265972253062169	9181/144100/9863/60/56288/143162/261734/55691/50848/595/84552/6904/23150/24146/83700/55114	16
GO:0099092	CC	postsynaptic density, intracellular component	5/875	17/19559	0,000698884537301657	0,0304821178961569	0,0265972253062169	1496/9181/6457/6792/29	5
GO:0031672	CC	A band	7/875	37/19559	0,00111170197889746	0,0422543310947734	0,0368690905310378	342527/287/9759/84033/9172/2023/286	7
GO:0005923	CC	bicellular tight junction	14/875	122/19559	0,00111783944695168	0,0422543310947734	0,0368690905310378	9181/9863/56288/143162/261734/55691/50848/595/84552/6904/23150/24146/83700/55114	14
GO:0099240	CC	intrinsic component of synaptic membrane	17/875	166/19559	0,00126887816513336	0,0436785960056246	0,038111835371101	64084/9378/146395/23767/1145/3760/2903/3356/2239/22871/9123/1140/148281/2561/2823/9127/6511	17
GO:0055038	CC	recycling endosome membrane	11/875	85/19559	0,00139815867966926	0,0436785960056246	0,038111835371101	26056/3105/3135/3106/3134/57537/10397/3107/56850/55630/113178	11
GO:0099699	CC	integral component of synaptic membrane	16/875	154/19559	0,00149715604101376	0,0436785960056246	0,038111835371101	64084/9378/146395/23767/1145/3760/2903/3356/22871/9123/1140/148281/2561/2823/9127/6511	16
GO:0044295	CC	axonal growth cone	6/875	29/19559	0,00154593741264325	0,0436785960056246	0,038111835371101	51199/203228/22906/56288/23767/2823	6
GO:0030426	CC	growth cone	18/875	184/19559	0,0015639117457258	0,0436785960056246	0,038111835371101	51199/7077/203228/26053/6622/22906/56288/23022/57616/23767/7531/3831/6792/4644/2823/27185/2596/2316	18
GO:0098982	CC	GABA-ergic synapse	10/875	74/19559	0,00163412550604588	0,0436785960056246	0,038111835371101	266727/3084/22997/9378/1012/1488/2561/1487/2596/2743	10
GO:0005769	CC	early endosome	30/875	377/19559	0,00172398139617512	0,0436785960056246	0,038111835371101	26056/23250/1956/57732/114804/287/55614/3105/51160/6457/22906/3135/3106/54982/6614/3134/255738/79890/57537/3107/9110/857/56850/23209/81614/157807/4644/153020/122618/142678	30
GO:0099572	CC	postsynaptic specialization	29/875	361/19559	0,00177179489969906	0,0436785960056246	0,038111835371101	1496/9181/9863/64084/9743/22997/6457/152404/146395/57537/22849/1600/1145/2903/1740/6792/22871/9123/6208/9419/1140/29/408/2561/54583/27185/2596/9127/2891	29
GO:0099091	CC	postsynaptic specialization, intracellular component	5/875	21/19559	0,00198047303489306	0,0467886754493487	0,0408255406315676	1496/9181/6457/6792/29	5
GO:0031078	MF	histone deacetylase activity (H3-K14 specific)	5/846	10/18352	4,27115444841521e-05	0,0180794527442974	0,0172296273369052	9759/10013/3065/9734/55869	5
GO:0032041	MF	NAD-dependent histone deacetylase activity (H3-K14 specific)	5/846	10/18352	4,27115444841521e-05	0,0180794527442974	0,0172296273369052	9759/10013/3065/9734/55869	5
GO:0042605	MF	peptide antigen binding	8/846	31/18352	6,03990626201473e-05	0,0180794527442974	0,0172296273369052	3105/3135/3106/8140/3134/3107/3123/3119	8
