# Supplementary material for: DNA Methylation Patterns in CD8+ T Cells Discern Psoriasis From Psoriatic Arthritis and Correlate With Cutaneous Disease Activity
Source: Front Cell Dev Biol. 2021 Oct 21;9:746145. doi: 10.3389/fcell.2021.746145 (PMC8567019; doi:10.3389/fcell.2021.746145)
Supplement: Supplementary file 2 [file Table_2.XLSX]

## Sheet: Sheet1
Supplementary Table 2: Gene onthology analysis of DMPs in promoters and gene bodies of skin psoriasis and PsA patients
ID	ONTOLOGY	Description	GeneRatio	BgRatio	pvalue	p.adjust	qvalue	geneID	Count
GO:0007389	BP	pattern specification process	45/792	455/18866	9,35811796986186e-08	0,00047286570101712	0,000430079400593862	5046/22856/3212/8642/23314/2296/718/655/7474/7849/2626/9371/6423/3216/3213/7704/3232/8854/6092/7048/27031/6910/26146/10252/6497/6926/8022/6493/4435/389549/3235/1046/3549/7477/65009/10683/388585/2294/3214/5076/163589/7516/80319/9935/658	45
GO:0048568	BP	embryonic organ development	44/792	451/18866	1,91621503580604e-07	0,000484131728796395	0,00044032604454364	1956/3212/23314/2296/51057/655/80736/7474/3586/10083/6134/7849/2626/3216/3213/3232/8854/161497/7048/27031/25836/347733/26146/79733/6926/677/6886/4435/3235/1046/3549/7477/65009/1739/2294/29/3214/5076/8013/2778/9935/5426/54583/9132	44
GO:0003002	BP	regionalization	34/792	355/18866	7,01416068342596e-06	0,0118026324926361	0,0107346950665783	5046/22856/3212/2296/718/7474/7849/2626/6423/3216/3213/7704/3232/8854/6092/26146/10252/6497/6926/8022/389549/3235/1046/7477/10683/388585/2294/3214/5076/163589/7516/80319/9935/658	34
GO:0051216	BP	cartilage development	23/792	197/18866	9,34306945785557e-06	0,0118026324926361	0,0107346950665783	5745/22856/861/23314/1277/655/7474/6423/3213/399979/7704/64764/3232/7048/3696/3549/7477/388585/633/2778/51222/81029/658	23
GO:0060541	BP	respiratory system development	23/792	204/18866	1,65842484092699e-05	0,0146448310824038	0,0133197230422313	1956/9509/51057/3488/7474/8854/7048/27031/6910/10252/6497/64759/4015/8022/6493/7477/93649/2294/54206/79925/1896/54768/4311	23
GO:0016570	BP	histone modification	40/792	468/18866	1,73894689282452e-05	0,0146448310824038	0,0133197230422313	29128/6419/55870/23133/4000/26038/5927/79813/63925/5252/1386/51322/9759/2672/9810/9329/377630/25836/5978/6500/6497/672/26155/3065/11105/23410/5563/9643/93649/7874/64754/51773/90665/23081/604/55683/2070/122953/55929/80312	40
GO:0048880	BP	sensory system development	35/792	394/18866	2,60614205269351e-05	0,0173526795606488	0,0157825573055699	221935/1956/5158/2296/51057/718/655/80736/7474/10083/261734/22882/5316/4901/8854/64093/7048/25836/1421/26146/10252/6497/3065/3549/7477/54549/4286/1739/388585/1545/5076/2823/91851/81029/658	35
GO:0048562	BP	embryonic organ morphogenesis	29/792	302/18866	3,10980290828354e-05	0,0173526795606488	0,0157825573055699	3212/23314/51057/655/80736/7474/10083/7849/2626/3216/3213/3232/161497/7048/27031/25836/6926/3235/3549/65009/1739/2294/29/3214/5076/8013/2778/9935/9132	29
GO:0016569	BP	covalent chromatin modification	40/792	481/18866	3,24724805568493e-05	0,0173526795606488	0,0157825573055699	29128/6419/55870/23133/4000/26038/5927/79813/63925/5252/1386/51322/9759/2672/9810/9329/377630/25836/5978/6500/6497/672/26155/3065/11105/23410/5563/9643/93649/7874/64754/51773/90665/23081/604/55683/2070/122953/55929/80312	40
GO:0072001	BP	renal system development	28/792	292/18866	4,34511371270599e-05	0,0173526795606488	0,0157825573055699	56913/6772/8642/2296/51057/9863/655/7474/7849/7704/8854/6092/27031/25836/26146/10252/4811/4435/7477/93649/4318/1739/5017/388585/2294/5076/284/4311	28
GO:0150063	BP	visual system development	34/792	388/18866	4,45987310055487e-05	0,0173526795606488	0,0157825573055699	221935/1956/5158/2296/51057/718/655/7474/10083/261734/22882/5316/4901/8854/64093/7048/25836/1421/26146/10252/6497/3065/3549/7477/54549/4286/1739/388585/1545/5076/2823/91851/81029/658	34
GO:0090185	BP	negative regulation of kidney development	6/792	17/18866	4,46514524779049e-05	0,0173526795606488	0,0157825573055699	6772/655/7849/4435/4318/5076	6
GO:0061448	BP	connective tissue development	26/792	262/18866	4,53503174541159e-05	0,0173526795606488	0,0157825573055699	5745/22856/861/23314/1277/655/7474/1386/6423/3213/399979/7704/64764/3232/79068/7048/3696/4015/3549/7477/388585/633/2778/51222/81029/658	26
GO:0006476	BP	protein deacetylation	14/792	97/18866	5,18141660362746e-05	0,0173526795606488	0,0157825573055699	5927/9759/377630/25836/5978/6497/3065/23410/5563/9643/90665/604/2316/122953	14
GO:0031589	BP	cell-substrate adhesion	32/792	359/18866	5,35370305114023e-05	0,0173526795606488	0,0157825573055699	284348/10232/10395/23189/1277/55612/51057/87/56999/25890/55698/6614/3232/161497/5328/4289/4811/1012/55966/10516/2294/3673/6904/5054/6251/10391/284/604/1896/22998/2013/2316	32
GO:0035107	BP	appendage morphogenesis	18/792	150/18866	5,94173485331523e-05	0,0173526795606488	0,0157825573055699	23288/51057/655/7474/6423/7704/8854/6910/25836/26146/6497/6926/3065/3235/3549/2778/51222/658	18
GO:0035108	BP	limb morphogenesis	18/792	150/18866	5,94173485331523e-05	0,0173526795606488	0,0157825573055699	23288/51057/655/7474/6423/7704/8854/6910/25836/26146/6497/6926/3065/3235/3549/2778/51222/658	18
GO:0098732	BP	macromolecule deacylation	15/792	111/18866	6,18144136338171e-05	0,0173526795606488	0,0157825573055699	5927/9759/377630/25836/7920/5978/6497/3065/23410/5563/9643/90665/604/2316/122953	15
GO:0043010	BP	camera-type eye development	30/792	332/18866	7,08795069608523e-05	0,0175706466725492	0,0159808021024196	221935/1956/5158/2296/51057/655/7474/10083/261734/22882/5316/4901/8854/7048/1421/26146/10252/6497/3065/3549/7477/54549/4286/1739/388585/1545/5076/2823/81029/658	30
GO:0048736	BP	appendage development	20/792	181/18866	7,69762896740683e-05	0,0175706466725492	0,0159808021024196	23288/51057/655/7474/6423/7704/8854/64093/6910/25836/26146/6497/6926/3065/3235/3549/5066/2778/51222/658	20
GO:0060173	BP	limb development	20/792	181/18866	7,69762896740683e-05	0,0175706466725492	0,0159808021024196	23288/51057/655/7474/6423/7704/8854/64093/6910/25836/26146/6497/6926/3065/3235/3549/5066/2778/51222/658	20
GO:1902337	BP	regulation of apoptotic process involved in morphogenesis	5/792	12/18866	7,96939463033727e-05	0,0175706466725492	0,0159808021024196	2296/655/7849/7421/5076	5
GO:0050808	BP	synapse organization	36/792	433/18866	7,99772162019853e-05	0,0175706466725492	0,0159808021024196	1496/221935/80823/1488/8495/9863/718/5364/831/87/7474/3586/2213/23191/9378/6092/56850/56130/5978/57689/56132/57549/2239/6792/7477/22829/54549/1739/10810/80728/4644/139065/3084/26050/2823/54583	36
GO:0001654	BP	eye development	33/792	384/18866	8,37918217048769e-05	0,0176416697947809	0,0160453988405041	221935/1956/5158/2296/51057/655/7474/10083/261734/22882/5316/4901/8854/64093/7048/25836/1421/26146/10252/6497/3065/3549/7477/54549/4286/1739/388585/1545/5076/2823/91851/81029/658	33
GO:0016575	BP	histone deacetylation	12/792	79/18866	0,000106249082788986	0,0208308460200433	0,0189460088792503	5927/9759/377630/25836/5978/6497/3065/23410/9643/90665/604/122953	12
GO:0007160	BP	cell-matrix adhesion	23/792	230/18866	0,000108983902991709	0,0208308460200433	0,0189460088792503	284348/10232/10395/55612/51057/87/56999/6614/3232/161497/5328/4289/4811/1012/55966/10516/3673/5054/10391/604/1896/22998/2013	23
GO:0048706	BP	embryonic skeletal system development	16/792	130/18866	0,000111306717304803	0,0208308460200433	0,0189460088792503	3212/23314/1277/655/7474/56243/3216/3213/3232/7048/25836/3235/3549/1739/3214/2778	16
GO:0007494	BP	midgut development	5/792	13/18866	0,000125031351990497	0,0225636936288564	0,0205220632628011	1956/7474/8854/1600/2294	5
GO:0009952	BP	anterior/posterior pattern specification	22/792	219/18866	0,000142805538734123	0,0241694153986008	0,021982494532751	5046/3212/2296/7474/2626/6423/3216/3213/7704/3232/8854/6497/6926/389549/3235/1046/10683/388585/2294/3214/163589/7516	22
GO:0048545	BP	response to steroid hormone	30/792	346/18866	0,000148458085435728	0,0241694153986008	0,021982494532751	1956/861/1277/655/3651/3586/11057/27086/23019/5106/117155/7048/58/79876/5978/140880/672/4015/8312/677/3065/2908/865/7477/64754/10888/54206/5066/8013/190	30
GO:0009880	BP	embryonic pattern specification	11/792	70/18866	0,000149762884157496	0,0241694153986008	0,021982494532751	5046/23314/655/7474/7704/6926/6493/4435/3549/163589/80319	11
GO:0035601	BP	protein deacylation	14/792	107/18866	0,000153061803434638	0,0241694153986008	0,021982494532751	5927/9759/377630/25836/5978/6497/3065/23410/5563/9643/90665/604/2316/122953	14
GO:1904748	BP	regulation of apoptotic process involved in development	5/792	14/18866	0,000187785009969284	0,0287538683446906	0,0261521324888642	2296/655/7849/7421/5076	5
GO:0090162	BP	establishment of epithelial cell polarity	7/792	30/18866	0,000195347888111666	0,0290321434890661	0,026405228467354	55612/7474/55691/23150/388585/2294/64083	7
GO:0044728	BP	DNA methylation or demethylation	13/792	98/18866	0,000226961416688274	0,0327667439578814	0,0298019111356693	4552/54456/79813/6996/60489/79068/672/7874/4255/163589/2778/55929/80312	13
GO:0048705	BP	skeletal system morphogenesis	22/792	228/18866	0,000254111658080278	0,0356673946744346	0,0324401023151606	22856/3212/23314/1277/2296/655/2268/6423/3216/3213/3232/5027/7048/25836/6497/3235/3549/1739/3214/79925/2778/658	22
GO:0071474	BP	cellular hyperosmotic response	5/792	15/18866	0,000271972510708807	0,0369607159898385	0,0336164000565865	9181/5602/80303/54206/6513	5
GO:0030326	BP	embryonic limb morphogenesis	15/792	127/18866	0,000285269725629072	0,0369607159898385	0,0336164000565865	51057/655/7474/6423/7704/8854/6910/25836/26146/6497/6926/3065/3235/3549/2778	15
GO:0035113	BP	embryonic appendage morphogenesis	15/792	127/18866	0,000285269725629072	0,0369607159898385	0,0336164000565865	51057/655/7474/6423/7704/8854/6910/25836/26146/6497/6926/3065/3235/3549/2778	15
GO:0030856	BP	regulation of epithelial cell differentiation	18/792	171/18866	0,000316507007927727	0,0399827477764701	0,0363649893845383	6772/861/2296/5583/7849/10252/6926/677/55966/4435/865/4318/388585/406902/7421/5076/5054/54206	18
GO:0001655	BP	urogenital system development	28/792	330/18866	0,000346871787787906	0,0417347890955268	0,0379585007741248	56913/6772/8642/2296/51057/9863/655/7474/7849/7704/8854/6092/27031/25836/26146/10252/4811/4435/7477/93649/4318/1739/5017/388585/2294/5076/284/4311	28
GO:0048332	BP	mesoderm morphogenesis	11/792	77/18866	0,000354372531713643	0,0417347890955268	0,0379585007741248	2296/655/7474/6423/7296/6926/6886/2294/3673/5076/8013	11
GO:0048661	BP	positive regulation of smooth muscle cell proliferation	13/792	103/18866	0,000373088158514469	0,0417347890955268	0,0379585007741248	1956/6772/3488/3586/27086/4217/9759/7048/1012/4318/388585/3673/8013	13
GO:0042430	BP	indole-containing compound metabolic process	6/792	24/18866	0,00037749064775268	0,0417347890955268	0,0379585007741248	114781/1644/23498/2903/285671/169355	6
GO:0001822	BP	kidney development	25/792	283/18866	0,000389210062629966	0,0417347890955268	0,0379585007741248	56913/6772/8642/2296/51057/9863/655/7849/7704/8854/6092/27031/25836/26146/10252/4811/4435/7477/4318/1739/5017/388585/5076/284/4311	25
GO:0003205	BP	cardiac chamber development	18/792	174/18866	0,000391466342376595	0,0417347890955268	0,0379585007741248	2296/655/7474/4625/7849/2626/6423/287/6092/7048/27031/6910/6926/93649/2294/3084/54583/7798	18
GO:0003231	BP	cardiac ventricle development	15/792	131/18866	0,000399865234036537	0,0417347890955268	0,0379585007741248	2296/7474/4625/7849/2626/6423/6092/7048/6910/6926/93649/2294/3084/54583/7798	15
GO:0007162	BP	negative regulation of cell adhesion	26/792	301/18866	0,00042423897698076	0,0417347890955268	0,0379585007741248	10395/861/23189/1277/5364/3586/84959/65125/2213/3146/4155/3123/1012/55966/1600/5607/865/3549/1739/1545/6904/5054/10391/284/604/8379	26
GO:2000736	BP	regulation of stem cell differentiation	14/792	118/18866	0,000429541080054707	0,0417347890955268	0,0379585007741248	861/2296/5702/655/2626/6910/5978/6886/5719/865/10213/388585/3214/23081	14
GO:0010463	BP	mesenchymal cell proliferation	8/792	44/18866	0,000430875050801842	0,0417347890955268	0,0379585007741248	6772/8642/4000/655/7474/7048/3549/2294	8
GO:0030199	BP	collagen fibril organization	9/792	55/18866	0,000434050437192076	0,0417347890955268	0,0379585007741248	9509/1277/2296/165/6423/140766/7148/4015/1545	9
GO:0051090	BP	regulation of DNA-binding transcription factor activity	35/792	455/18866	0,000438510318098211	0,0417347890955268	0,0379585007741248	84433/9181/83696/57118/170959/7311/5583/655/5927/7474/3586/1386/9759/7546/23085/2672/5602/2177/84166/55655/5601/5607/93649/406951/7874/1545/90933/1896/11060/2316/7335/5195/190/54583/136319	35
GO:0071383	BP	cellular response to steroid hormone stimulus	20/792	206/18866	0,000440106558509678	0,0417347890955268	0,0379585007741248	1956/861/655/11057/27086/23019/5106/79876/5978/140880/672/8312/677/3065/2908/865/64754/54206/8013/190	20
GO:0035510	BP	DNA dealkylation	7/792	34/18866	0,000446008037039075	0,0417347890955268	0,0379585007741248	6996/60489/79068/51008/7874/4255/80312	7
GO:0055123	BP	digestive system development	16/792	147/18866	0,000461127211261301	0,0423650145182428	0,0385317015189826	1956/56913/8642/51057/3651/7474/2626/6423/8854/7048/27031/25836/1600/3549/93649/2294	16
GO:0030324	BP	lung development	18/792	177/18866	0,000481343539789643	0,0434326590456619	0,0395027423819846	1956/9509/3488/7474/8854/7048/27031/6910/10252/64759/4015/8022/6493/7477/93649/2294/54206/4311	18
GO:0045995	BP	regulation of embryonic development	15/792	134/18866	0,000509866612545274	0,0442623817227238	0,0402573892739929	51057/655/7474/79813/3586/6996/65125/6423/4155/27031/25836/26146/5607/388585/7182	15
GO:0006304	BP	DNA modification	14/792	120/18866	0,000510249121963456	0,0442623817227238	0,0402573892739929	4552/54456/79813/6996/60489/79068/672/51008/7874/4255/163589/2778/55929/80312	14
GO:0042428	BP	serotonin metabolic process	4/792	10/18866	0,000528425813459536	0,0442623817227238	0,0402573892739929	114781/1644/2903/285671	4
GO:0031056	BP	regulation of histone modification	16/792	149/18866	0,000535997314655089	0,0442623817227238	0,0402573892739929	4000/5927/63925/5252/2672/9810/377630/25836/6497/672/26155/93649/23081/604/122953/80312	16
GO:0110111	BP	negative regulation of animal organ morphogenesis	7/792	35/18866	0,00053753816010013	0,0442623817227238	0,0402573892739929	6772/2296/655/7474/7849/4435/5076	7
GO:0048732	BP	gland development	34/792	443/18866	0,000547887567653887	0,0442623817227238	0,0402573892739929	1956/55870/6430/2113/2296/655/3651/3488/7474/3586/6134/7849/3213/5106/3232/8854/7048/27031/79733/9247/6926/8022/3235/3549/7477/2294/3673/7421/5066/3084/1896/9935/8379/190	34
GO:0048565	BP	digestive tract development	15/792	135/18866	0,000551856332580961	0,0442623817227238	0,0402573892739929	1956/56913/8642/3651/7474/2626/6423/8854/7048/27031/25836/1600/3549/93649/2294	15
GO:0030323	BP	respiratory tube development	18/792	181/18866	0,000628530878489851	0,049624477015769	0,0451343061757679	1956/9509/3488/7474/8854/7048/27031/6910/10252/64759/4015/8022/6493/7477/93649/2294/54206/4311	18
GO:0062197	BP	cellular response to chemical stress	29/792	360/18866	0,000639650775612646	0,0497254672180108	0,0452261584829929	9181/1956/116988/2113/655/3586/79912/2626/4217/406884/5602/2177/5978/80303/9529/7296/1421/677/5601/10516/23410/5563/4318/1545/5076/54206/1728/8013/6513	29
