# Supplementary material for: DNA Methylation Patterns in CD8+ T Cells Discern Psoriasis From Psoriatic Arthritis and Correlate With Cutaneous Disease Activity
Source: Front Cell Dev Biol. 2021 Oct 21;9:746145. doi: 10.3389/fcell.2021.746145 (PMC8567019; doi:10.3389/fcell.2021.746145)
Supplement: Supplementary file 3 [file Table_7.xlsx]

## Sheet: Sheet1
Supplementary Table 7: Gene onthology analysis of DMPs in promoters and gene bodies in "all psoriasis" before and after treatment
ID	ONTOLOGY	Description	GeneRatio	BgRatio	pvalue	p.adjust	qvalue	geneID	Count
GO:0007389	BP	pattern specification process	80/1383	455/18866	1,61052427327583e-13	9,10912528964807e-10	8,20519735016315e-10	4041/2186/2303/5080/3234/4487/5076/23314/120237/140628/22955/8831/50805/3670/79191/1044/6910/8646/2290/8313/7545/5015/3169/1745/5013/6790/63950/55502/388389/2018/79971/5308/2253/10468/7516/4825/3233/3232/4821/3221/2260/2019/4088/80199/30062/23322/3238/344022/3225/3222/3223/3216/3213/7481/55079/7474/4300/64321/10716/388591/54880/123872/652/8553/2668/3975/4488/3227/6909/8022/2626/5649/80173/8854/40…	80
GO:0003002	BP	regionalization	67/1383	355/18866	5,49309498315475e-13	1,55344726123616e-09	1,39929366939311e-09	4041/2186/2303/5080/3234/4487/5076/120237/140628/22955/3670/79191/1044/8646/2290/8313/5015/3169/1745/5013/6790/63950/55502/2018/79971/5308/2253/7516/4825/3233/3232/4821/3221/2260/2019/4088/80199/23322/344022/3225/3222/3223/3216/3213/7481/55079/7474/4300/64321/10716/123872/652/8553/2668/3975/4488/3227/8022/2626/5649/8854/4087/9355/4681/51176/80319/472	67
GO:0048568	BP	embryonic organ development	75/1383	451/18866	1,5725680710178e-11	2,96481500322556e-08	2,6706068293776e-08	2186/55084/2303/3481/196528/5080/2067/6886/4487/5076/23314/1739/6664/6788/2778/7262/6913/5396/2290/2295/7545/286262/5013/6670/388389/10413/2253/4647/7005/9496/3233/3232/3221/29/4323/2260/2019/4088/80199/51057/344022/113026/5914/3225/3216/3213/7481/9394/677/7474/11078/64321/2535/10716/220/388591/79977/219736/123872/652/5079/1969/2668/3975/3227/51384/6909/2626/8854/203447/4087/161497/5915/51176/157…	75
GO:0048562	BP	embryonic organ morphogenesis	57/1383	302/18866	3,00645067004174e-11	4,25112124743902e-08	3,82926874815843e-08	55084/2303/5080/4487/5076/23314/1739/6664/2778/6913/5396/2290/2295/7545/286262/5013/6670/388389/10413/2253/4647/3233/3232/3221/29/4323/2260/4088/80199/51057/344022/3225/3216/3213/7481/7474/11078/64321/2535/10716/220/388591/79977/219736/123872/652/5079/1969/3975/3227/51384/6909/2626/4087/161497/5915/157506	57
GO:0030900	BP	forebrain development	64/1383	391/18866	9,6175042327801e-10	1,08793207881209e-06	9,79973062876962e-07	5455/66000/2113/5080/4628/85458/22911/4487/23314/93986/57178/3670/7101/1020/22803/23224/10642/8646/2290/3361/5015/23287/1745/5013/63950/2018/5308/2253/64211/9353/63827/221692/317762/2260/6658/30062/23322/2902/116/5914/3747/2909/10092/55079/7474/10716/220/219409/1638/27164/26038/652/5079/1141/6657/3975/8022/5649/8854/9355/5108/5915/51176/8925	64
GO:0009952	BP	anterior/posterior pattern specification	42/1383	219/18866	7,28310768602147e-09	6,86554284535623e-06	6,18425284216559e-06	4041/2186/2303/5080/3234/4487/22955/1044/8313/5015/5013/6790/55502/2018/79971/2253/7516/3233/3232/3221/2019/4088/80199/3225/3222/3223/3216/3213/55079/7474/4300/64321/652/8553/3975/4488/3227/2626/8854/4087/51176/472	42
GO:0048706	BP	embryonic skeletal system development	30/1383	130/18866	1,32199408752721e-08	1,06817122272198e-05	9,62173140395742e-06	2303/23314/1739/6664/2778/6913/5396/1745/6670/2253/3233/3232/3221/4323/4088/80199/3225/3222/3223/3216/3213/7481/7474/79977/652/5079/3975/3227/4087/157506	30
GO:0090596	BP	sensory organ morphogenesis	46/1383	269/18866	5,75761126460373e-08	3,72732744787639e-05	3,35745270001521e-05	4041/221935/55084/5080/4487/5076/6664/10152/1735/627/5396/2290/2295/83552/7545/23287/286262/5013/6670/1826/7287/362/5308/2253/4647/7021/29/2260/51057/23322/7474/11078/2535/220/219736/7068/7070/57096/652/1969/3975/118427/51384/6909/161497/5915	46
GO:0045165	BP	cell fate commitment	47/1383	278/18866	5,93103731097728e-08	3,72732744787639e-05	3,35745270001521e-05	2303/5080/6886/5076/23314/6095/120237/140628/3670/167826/7101/6913/6910/5396/84695/2290/3169/3175/1745/63950/2253/4825/7005/9496/4821/2260/6934/5914/7481/5468/55079/7474/64321/10716/219409/26038/652/89870/6657/80326/51384/6909/8022/2626/4087/3110/9181	47
GO:0048704	BP	embryonic skeletal system morphogenesis	24/1383	97/18866	9,0191290610639e-08	5,10121939693774e-05	4,59500891111045e-05	2303/23314/1739/6664/2778/6913/5396/2253/3233/3232/3221/4323/4088/80199/3225/3216/3213/79977/652/5079/3975/3227/4087/157506	24
GO:0060541	BP	respiratory system development	37/1383	204/18866	2,48450322103325e-07	0,000105335279024578	9,4882518886131e-05	55294/93986/6664/407975/6910/84695/3169/6670/55512/10413/2253/54768/9496/4323/2260/94235/51057/23322/342371/5914/7481/9394/7474/220/79977/7068/123872/652/340419/8022/8854/4087/7534/5499/80004/51176/157506	37
GO:0001654	BP	eye development	57/1383	384/18866	2,55310768787236e-07	0,000105335279024578	9,4882518886131e-05	4041/221935/2303/5080/4628/5076/93986/1739/6664/10152/1735/7101/627/22803/11023/2295/83552/23287/1745/6670/1826/7287/362/5308/4647/7021/4088/30062/51057/23322/2823/5914/7431/2909/7474/8322/220/5158/79977/155051/7068/7070/57096/652/1969/6657/3975/118427/51384/6909/8854/91851/9355/57030/4867/5915/157506	57
GO:0048880	BP	sensory system development	58/1383	394/18866	2,6708978386782e-07	0,000105335279024578	9,4882518886131e-05	4041/221935/2303/5080/4628/5076/93986/1739/6664/10152/3670/1735/7101/627/22803/11023/2295/83552/23287/1745/6670/1826/7287/362/5308/4647/7021/4088/30062/51057/23322/2823/5914/7431/2909/7474/8322/220/5158/79977/155051/7068/7070/57096/652/1969/6657/3975/118427/51384/6909/8854/91851/9355/57030/4867/5915/157506	58
GO:0007409	BP	axonogenesis	67/1383	482/18866	2,88322697745546e-07	0,000105335279024578	9,4882518886131e-05	23114/9024/5080/4628/10211/284656/885/9369/5076/285220/152330/5803/8831/22906/3670/54910/7101/4137/1020/627/10509/644168/11023/7204/1796/10048/2290/5015/10500/10752/1826/9378/2253/107/4825/9353/6711/1951/4914/4803/2887/9046/2902/57689/3925/2909/55079/7474/1945/1944/10716/6049/7070/494470/1141/1969/2817/2668/3975/2803/3320/8022/4147/5649/9355/23011/399	67
GO:0048592	BP	eye morphogenesis	31/1383	156/18866	2,9076669545231e-07	0,000105335279024578	9,4882518886131e-05	4041/221935/5080/5076/6664/10152/1735/627/2295/83552/23287/6670/1826/7287/362/5308/4647/7021/23322/7474/220/7068/7070/57096/652/1969/3975/118427/51384/6909/5915	31
GO:0007411	BP	axon guidance	46/1383	284/18866	2,9797815848537e-07	0,000105335279024578	9,4882518886131e-05	23114/5080/4628/284656/9369/285220/152330/3670/54910/1020/627/10509/644168/11023/7204/1796/10048/2290/5015/10500/10752/1826/9378/2253/9353/6711/1951/4914/2887/9046/2909/55079/7474/1945/1944/10716/494470/1969/2817/2668/3975/8022/4147/5649/9355/399	46
GO:0097485	BP	neuron projection guidance	46/1383	285/18866	3,3063143935496e-07	0,000110003024764215	9,90870691317651e-05	23114/5080/4628/284656/9369/285220/152330/3670/54910/1020/627/10509/644168/11023/7204/1796/10048/2290/5015/10500/10752/1826/9378/2253/9353/6711/1951/4914/2887/9046/2909/55079/7474/1945/1944/10716/494470/1969/2817/2668/3975/8022/4147/5649/9355/399	46
GO:0150063	BP	visual system development	57/1383	388/18866	3,62162396362921e-07	0,000113799472990482	0,000102506783531961	4041/221935/2303/5080/4628/5076/93986/1739/6664/10152/1735/7101/627/22803/11023/2295/83552/23287/1745/6670/1826/7287/362/5308/4647/7021/4088/30062/51057/23322/2823/5914/7431/2909/7474/8322/220/5158/79977/155051/7068/7070/57096/652/1969/6657/3975/118427/51384/6909/8854/91851/9355/57030/4867/5915/157506	57
GO:0021953	BP	central nervous system neuron differentiation	35/1383	192/18866	4,59238339994607e-07	0,00013670800268471	0,000123142025793568	5080/6886/23314/6095/120237/57178/3670/167826/7101/4137/1020/2290/23287/1745/2253/64211/4825/9353/4821/136319/2909/55079/7474/10716/219409/27164/26038/266727/1141/3975/3320/8022/1453/3110/8925	35
GO:0090287	BP	regulation of cellular response to growth factor stimulus	48/1383	310/18866	6,48585630868031e-07	0,000183420016409479	0,000165218655442172	66000/11167/4641/4487/4908/6664/8425/407975/51341/23089/94031/3622/8646/5015/857/3175/1745/10755/7316/10468/9353/7021/203100/63976/2260/4088/80199/4092/5579/2887/114990/1149/7474/8322/5654/652/11156/8837/494470/56937/2817/4734/4488/2626/652991/91851/4087/4681	48
GO:0050804	BP	modulation of chemical synaptic transmission	63/1383	454/18866	6,91027909666953e-07	0,000186116850336966	0,000167647873823962	6844/66000/2899/9699/57555/10211/5217/4908/152330/2914/8831/2693/7101/4137/1020/627/22883/4889/10590/266743/1816/10755/23096/9627/9378/321/22941/6863/107/22849/11188/59284/7349/22839/254263/5908/1269/29/4914/4803/5579/2902/23154/2918/116/57689/5914/2917/8224/2752/2912/1759/8541/6857/9294/1141/22997/2668/8526/5590/5649/9498/154	63
GO:0099177	BP	regulation of trans-synaptic signaling	63/1383	455/18866	7,46233809187639e-07	0,000191849928398422	0,000172812040022401	6844/66000/2899/9699/57555/10211/5217/4908/152330/2914/8831/2693/7101/4137/1020/627/22883/4889/10590/266743/1816/10755/23096/9627/9378/321/22941/6863/107/22849/11188/59284/7349/22839/254263/5908/1269/29/4914/4803/5579/2902/23154/2918/116/57689/5914/2917/8224/2752/2912/1759/8541/6857/9294/1141/22997/2668/8526/5590/5649/9498/154	63
GO:0043010	BP	camera-type eye development	50/1383	332/18866	8,90141431347097e-07	0,000214276988322729	0,00019301359031527	4041/221935/2303/5080/4628/5076/93986/1739/6664/10152/1735/7101/22803/11023/2295/83552/1745/6670/1826/7287/362/5308/7021/4088/30062/51057/23322/2823/5914/7431/2909/7474/8322/220/5158/79977/155051/7068/7070/57096/652/1969/3975/51384/6909/8854/9355/57030/4867/157506	50
GO:0021983	BP	pituitary gland development	14/1383	42/18866	9,09237574212431e-07	0,000214276988322729	0,00019301359031527	2113/5080/4487/3670/5308/2253/6658/116/7474/219409/652/6657/8022/8854	14
GO:0048663	BP	neuron fate commitment	18/1383	67/18866	9,85193346968052e-07	0,000222890142818052	0,000200772033655805	5080/23314/120237/3670/167826/5396/2290/3169/1745/63950/4825/4821/55079/10716/219409/652/8022/3110	18
GO:0060562	BP	epithelial tube morphogenesis	49/1383	331/18866	1,89010492848744e-06	0,000411170518289421	0,00037036873902345	4041/2303/27086/5076/1739/6664/6788/54910/79191/7798/3169/4609/388389/10413/2253/9353/4323/170690/4088/80199/344022/5914/7481/2909/7474/64321/2535/10716/388591/65266/79977/219736/123872/652/84445/1969/2668/3975/340419/4488/6909/11019/2626/9355/5499/6046/80004/51176/157506	49
GO:0061351	BP	neural precursor cell proliferation	29/1383	154/18866	2,1991511943911e-06	0,000460681450202817	0,000414966541163857	5455/5080/85458/22911/6095/5803/7101/627/11023/10642/2290/63950/2018/2253/64211/29127/7005/2260/116/7474/1638/57096/9833/3975/4673/9355/9181/5108/51176	29
GO:0021537	BP	telencephalon development	41/1383	259/18866	2,3587534548226e-06	0,000476468197874164	0,00042918671884742	5455/66000/5080/4628/85458/22911/93986/57178/7101/1020/22803/23224/10642/2290/3361/23287/1745/63950/2018/2253/64211/9353/63827/221692/317762/23322/2902/5914/55079/7474/10716/220/27164/652/5079/3975/5649/9355/5915/51176/8925	41
GO:0021543	BP	pallium development	31/1383	173/18866	2,97372182088196e-06	0,000579978297203737	0,00052242517651792	5455/66000/5080/85458/22911/93986/57178/7101/1020/22803/23224/10642/2290/3361/1745/63950/2018/2253/64211/9353/63827/221692/317762/2902/5914/55079/10716/5079/5649/9355/51176	31
GO:0007178	BP	transmembrane receptor protein serine/threonine kinase signaling pathway	51/1383	359/18866	3,98168676256349e-06	0,00073095948769449	0,000658424015566391	9688/11167/4053/4487/51701/6664/8425/407975/57178/121551/51341/23089/94031/3622/8646/857/3175/1745/10755/7316/55512/10468/7021/203100/6711/63976/4088/4092/114990/7431/1149/7474/2530/5654/128853/652/494470/56937/353500/5590/4488/5045/25970/2626/652991/2657/91851/4087/4681/26060/51176	51
GO:0048705	BP	skeletal system morphogenesis	37/1383	228/18866	4,00631968149385e-06	0,00073095948769449	0,000658424015566391	4041/2303/3234/4487/162466/23314/1739/6664/2778/1044/6913/5396/8313/55512/2253/9496/3233/3232/3221/4323/2260/4088/80199/5914/3225/3216/3213/79977/652/29123/5079/3975/4488/3227/4087/5915/157506	37
GO:0048762	BP	mesenchymal cell differentiation	37/1383	229/18866	4,44758820600262e-06	0,000786111215410963	0,000708102859113575	2303/4487/5076/6664/140628/3670/54910/10509/6910/84695/2295/8313/3169/10500/4017/5308/2253/2260/4088/80199/6934/4092/114990/7481/7474/8751/652/2668/80326/152007/4488/51384/8854/4087/51094/51176/157506	37
GO:0021536	BP	diencephalon development	18/1383	74/18866	4,67270044981234e-06	0,000800872537701169	0,000721399367690326	2113/5080/4487/3670/5013/5308/2253/6658/30062/116/3747/7474/219409/652/1141/6657/8022/8854	18
GO:0003007	BP	heart morphogenesis	40/1383	258/18866	5,25672604695466e-06	0,000863527263283875	0,000777836662378835	2303/196528/4487/6664/407975/140628/57178/3670/7273/6910/4886/4889/8313/388389/10413/5308/2253/9353/7134/4088/4092/344022/5914/7481/7474/8751/64321/2535/10716/388591/79977/123872/652/4734/4488/51384/6909/2626/8854/5915	40
GO:0010092	BP	specification of animal organ identity	12/1383	36/18866	5,48594129382419e-06	0,000863527263283875	0,000777836662378835	5076/140628/3670/8313/2253/2260/7481/7474/10716/652/2668/3227	12
GO:0021872	BP	forebrain generation of neurons	16/1383	61/18866	5,49628385399921e-06	0,000863527263283875	0,000777836662378835	5080/23314/57178/7101/2290/1745/2253/64211/9353/2260/55079/7474/10716/1638/27164/51176	16
GO:0060485	BP	mesenchyme development	43/1383	290/18866	7,58867817682005e-06	0,00113091531731379	0,00101869093571778	2303/4487/5076/6664/140628/3670/54910/10509/6910/84695/2295/8313/3169/10500/4609/4017/10413/5308/2253/2260/4088/80199/6934/4092/114990/7481/677/7474/8751/652/2668/4734/80326/152007/4488/51384/6909/2626/8854/4087/51094/51176/157506	43
GO:0048736	BP	appendage development	31/1383	181/18866	7,79803701825283e-06	0,00113091531731379	0,00101869093571778	4041/4487/6664/79412/2778/6910/5396/5308/2253/9496/7021/2260/2019/30062/51057/23322/3238/5914/7474/79977/27164/652/494470/340419/4488/3227/6909/8854/5915/51176/157506	31
GO:0060173	BP	limb development	31/1383	181/18866	7,79803701825283e-06	0,00113091531731379	0,00101869093571778	4041/4487/6664/79412/2778/6910/5396/5308/2253/9496/7021/2260/2019/30062/51057/23322/3238/5914/7474/79977/27164/652/494470/340419/4488/3227/6909/8854/5915/51176/157506	31
GO:0090092	BP	regulation of transmembrane receptor protein serine/threonine kinase signaling pathway	39/1383	254/18866	8,66942822605164e-06	0,0012258571511637	0,00110421138458131	9688/11167/4487/6664/8425/407975/51341/23089/94031/3622/8646/857/3175/1745/10755/7316/10468/7021/203100/6711/63976/4088/4092/114990/1149/7474/5654/652/494470/56937/353500/4488/25970/2626/652991/2657/91851/4087/4681	39
GO:0002066	BP	columnar/cuboidal epithelial cell development	16/1383	64/18866	1,0737220526758e-05	0,00142971567533717	0,0012878403686131	5080/286262/10413/4647/4825/4821/2260/51057/5914/7474/11078/6009/652/161497/5915/286451	16
GO:0001708	BP	cell fate specification	21/1383	101/18866	1,11583689354349e-05	0,00142971567533717	0,0012878403686131	5080/5076/120237/3670/167826/6913/6910/3169/63950/4825/9496/4821/2260/7481/7474/64321/10716/6657/6909/8022/3110	21
GO:0035270	BP	endocrine system development	24/1383	125/18866	1,14389966942803e-05	0,00142971567533717	0,0012878403686131	2113/5080/4487/3670/3175/5308/2253/4825/3232/4821/4088/6658/116/3213/7481/7474/219409/6009/652/6657/8022/8854/4087/3110	24
GO:0048593	BP	camera-type eye morphogenesis	24/1383	125/18866	1,14389966942803e-05	0,00142971567533717	0,0012878403686131	4041/221935/5080/5076/6664/10152/1735/2295/6670/1826/362/5308/7021/23322/7474/220/7068/7070/57096/652/1969/3975/51384/6909	24
GO:0035107	BP	appendage morphogenesis	27/1383	150/18866	1,16278148984282e-05	0,00142971567533717	0,0012878403686131	4041/4487/6664/2778/6910/5396/2253/9496/7021/2260/2019/51057/23322/3238/7474/79977/27164/652/494470/340419/4488/3227/6909/8854/5915/51176/157506	27
GO:0035108	BP	limb morphogenesis	27/1383	150/18866	1,16278148984282e-05	0,00142971567533717	0,0012878403686131	4041/4487/6664/2778/6910/5396/2253/9496/7021/2260/2019/51057/23322/3238/7474/79977/27164/652/494470/340419/4488/3227/6909/8854/5915/51176/157506	27
GO:0035176	BP	social behavior	14/1383	51/18866	1,19027149359854e-05	0,00143237778038157	0,0012902383043711	9369/7101/2571/2922/266743/9378/22941/7349/2019/94235/2902/342371/1141/5108	14
GO:0002064	BP	epithelial cell development	35/1383	221/18866	1,24913886363926e-05	0,00147190196098826	0,00132584037281009	80781/2303/5080/10152/29842/3169/169044/3175/286262/10413/4647/4825/54768/4821/60484/5908/2260/4914/51057/5914/7431/7474/5138/11078/91663/6009/79977/84283/652/9294/1969/80173/161497/5915/286451	35
GO:0030324	BP	lung development	30/1383	177/18866	1,34135669799437e-05	0,00154830887425636	0,00139466518115849	55294/93986/6664/407975/6910/84695/3169/6670/55512/10413/2253/9496/4323/2260/342371/7481/9394/7474/79977/7068/123872/652/340419/8022/8854/4087/7534/5499/80004/157506	30
GO:0031076	BP	embryonic camera-type eye development	12/1383	39/18866	1,39477484932471e-05	0,00157776930955611	0,00142120216225928	5080/5076/6664/2295/6670/5914/7474/220/51384/6909/8854/157506	12
GO:0003151	BP	outflow tract morphogenesis	18/1383	80/18866	1,49894049079251e-05	0,00165301207052569	0,00148897834090381	2303/6664/407975/3670/4886/4889/5308/2253/5914/7481/7474/64321/2535/652/4734/4488/6909/5915	18
GO:0072132	BP	mesenchyme morphogenesis	14/1383	52/18866	1,51974235621173e-05	0,00165301207052569	0,00148897834090381	2303/4487/140628/3670/4609/2253/2260/4088/7481/7474/4488/6909/4087/51176	14
GO:0051091	BP	positive regulation of DNA-binding transcription factor activity	40/1383	270/18866	1,58948616544277e-05	0,00169625165127251	0,00152792711832036	4041/9759/5987/10211/23118/6788/51341/2100/10616/4919/3169/857/10014/7316/107/23085/4869/4825/4808/4821/9208/4914/4088/5579/136319/5468/9447/7474/57118/51360/2535/8322/89870/8837/85363/84433/5590/5649/9181/56919	40
GO:0035249	BP	synaptic transmission, glutamatergic	20/1383	96/18866	1,73849361734488e-05	0,00182091109253753	0,00164021620037997	2899/57555/2914/1020/9378/22941/59284/7349/254263/4914/2902/2918/116/2917/2752/2912/6857/5649/149111/57030	20
GO:0048339	BP	paraxial mesoderm development	8/1383	18/18866	1,83724431271846e-05	0,00188935524231557	0,00170186841599184	2303/10413/2260/4088/7481/7474/4087/51176	8
GO:0051703	BP	intraspecies interaction between organisms	14/1383	53/18866	1,92707159318333e-05	0,0019318956367552	0,00174018738961795	9369/7101/2571/2922/266743/9378/22941/7349/2019/94235/2902/342371/1141/5108	14
GO:1903845	BP	negative regulation of cellular response to transforming growth factor beta stimulus	19/1383	89/18866	1,94692452784736e-05	0,0019318956367552	0,00174018738961795	407975/51341/23089/94031/857/3175/1745/7316/203100/63976/4088/4092/114990/1149/5654/8837/56937/652991/4087	19
GO:0030323	BP	respiratory tube development	30/1383	181/18866	2,09571165772466e-05	0,00204368019587771	0,00184087920569644	55294/93986/6664/407975/6910/84695/3169/6670/55512/10413/2253/9496/4323/2260/342371/7481/9394/7474/79977/7068/123872/652/340419/8022/8854/4087/7534/5499/80004/157506	30
GO:0001657	BP	ureteric bud development	20/1383	98/18866	2,39014569543838e-05	0,0022912989921016	0,00206392598856766	2303/5076/1739/627/4609/2253/9353/2260/170690/4088/4092/5914/7481/652/4072/84445/2668/3975/4087/5915	20
GO:0048340	BP	paraxial mesoderm morphogenesis	6/1383	10/18866	2,49271303471161e-05	0,00234979748738814	0,00211661948912354	2303/4088/7481/7474/4087/51176	6
GO:0060021	BP	roof of mouth development	19/1383	91/18866	2,71030145070326e-05	0,00250629374218568	0,00225758611482518	2562/4487/23314/1739/6664/11023/5396/84695/2295/63976/51057/7481/55003/7474/2535/54880/6909/4087/51176	19
GO:0072163	BP	mesonephric epithelium development	20/1383	99/18866	2,79166382174147e-05	0,00250629374218568	0,00225758611482518	2303/5076/1739/627/4609/2253/9353/2260/170690/4088/4092/5914/7481/652/4072/84445/2668/3975/4087/5915	20
GO:0072164	BP	mesonephric tubule development	20/1383	99/18866	2,79166382174147e-05	0,00250629374218568	0,00225758611482518	2303/5076/1739/627/4609/2253/9353/2260/170690/4088/4092/5914/7481/652/4072/84445/2668/3975/4087/5915	20
GO:0048701	BP	embryonic cranial skeleton morphogenesis	13/1383	48/18866	2,84635877408825e-05	0,00251546956660049	0,00226585139253078	2303/2778/6913/5396/2253/4323/4088/79977/652/5079/3975/4087/157506	13
GO:0072073	BP	kidney epithelium development	25/1383	142/18866	3,56148384972933e-05	0,00309903886985678	0,00279151122796598	5455/2303/5076/1739/627/79191/4609/10413/2253/9353/7021/2260/170690/4088/4092/5914/7481/65266/652/4072/84445/2668/3975/4087/5915	25
GO:0030510	BP	regulation of BMP signaling pathway	19/1383	93/18866	3,73028423702864e-05	0,00316644028201259	0,00285222418017958	11167/4487/6664/94031/8646/1745/10468/7021/4092/7474/5654/652/494470/4488/2626/652991/91851/4087/4681	19
GO:0021761	BP	limbic system development	21/1383	109/18866	3,75091051794278e-05	0,00316644028201259	0,00285222418017958	66000/2113/7101/1020/22803/3361/1745/2018/64211/63827/2260/6658/30062/5914/10092/55079/10716/220/219409/5649/51176	21
GO:0035137	BP	hindlimb morphogenesis	11/1383	37/18866	4,54952373692826e-05	0,00363632730475652	0,00327548279517263	4487/2778/2253/9496/7021/23322/27164/652/340419/4488/5915	11
GO:0050769	BP	positive regulation of neurogenesis	60/1383	485/18866	4,55884205899599e-05	0,00363632730475652	0,00327548279517263	29993/443/147040/5080/9699/27/6664/5803/57498/22906/4137/627/79191/4919/2290/3169/118738/1745/63950/221914/1826/22941/22849/7516/4825/9353/59284/3232/4821/2260/4914/127833/4803/7077/116/5914/5468/2909/2242/55079/54606/7474/57118/90527/8322/84630/6009/1638/8437/6857/652/8837/4673/2803/5649/1453/23011/9181/5915/4681	60
GO:0030326	BP	embryonic limb morphogenesis	23/1383	127/18866	4,56469658128913e-05	0,00363632730475652	0,00327548279517263	4041/4487/2778/6910/5396/2253/9496/2260/2019/51057/23322/3238/7474/79977/652/340419/4488/3227/6909/8854/5915/51176/157506	23
GO:0035113	BP	embryonic appendage morphogenesis	23/1383	127/18866	4,56469658128913e-05	0,00363632730475652	0,00327548279517263	4041/4487/2778/6910/5396/2253/9496/2260/2019/51057/23322/3238/7474/79977/652/340419/4488/3227/6909/8854/5915/51176/157506	23
GO:0023019	BP	signal transduction involved in regulation of gene expression	8/1383	20/18866	4,63150546555538e-05	0,00363830484905295	0,0032772641013579	5080/4487/2253/4088/64321/4072/4488/4087	8
GO:0001823	BP	mesonephros development	20/1383	103/18866	5,06937054194836e-05	0,00392772051852875	0,00353796011867773	2303/5076/1739/627/4609/2253/9353/2260/170690/4088/4092/5914/7481/652/4072/84445/2668/3975/4087/5915	20
GO:0072089	BP	stem cell proliferation	23/1383	128/18866	5,18486554225286e-05	0,00396291885229489	0,00356966560803753	861/5080/6664/7101/2122/627/11023/2290/63950/10413/29127/7005/2260/2120/342371/677/7474/64321/5788/1638/4072/9181/51176	23
GO:0048645	BP	animal organ formation	15/1383	65/18866	5,54610987868082e-05	0,00418250632984249	0,00376746271057055	5076/140628/3670/6910/8313/2253/2260/7481/7474/64321/10716/652/2668/3227/157506	15
GO:1903844	BP	regulation of cellular response to transforming growth factor beta stimulus	23/1383	129/18866	5,87939502933303e-05	0,00437550766919837	0,00394131190332021	6664/8425/407975/51341/23089/94031/3622/857/3175/1745/10755/7316/203100/63976/4088/4092/114990/1149/5654/8837/56937/652991/4087	23
GO:0051966	BP	regulation of synaptic transmission, glutamatergic	16/1383	73/18866	6,18779647636029e-05	0,00451535660430169	0,00406728317665826	2899/57555/2914/1020/9378/22941/59284/7349/4914/2918/116/2917/2752/2912/6857/5649	16
GO:0002065	BP	columnar/cuboidal epithelial cell differentiation	22/1383	121/18866	6,22697692955325e-05	0,00451535660430169	0,00406728317665826	5080/6664/140628/3169/286262/10413/2253/4647/4825/4821/2260/51057/5914/7481/7474/11078/6009/652/2626/161497/5915/286451	22
GO:0071559	BP	response to transforming growth factor beta	37/1383	258/18866	6,60338063216492e-05	0,00472768618424364	0,00425854260621962	4053/463/51701/6664/8425/407975/57178/51341/23089/94031/3622/857/3175/1745/10755/7316/203100/63976/4088/4092/114990/677/1149/7474/5138/2530/5654/128853/8837/56937/80326/5590/80310/5045/652991/4087/26060	37
GO:0014047	BP	glutamate secretion	12/1383	45/18866	6,79844862248379e-05	0,00480650317609604	0,00432953833326599	6844/885/627/4889/10755/2917/2912/7200/8541/2744/6857/57030	12
GO:0060850	BP	regulation of transcription involved in cell fate commitment	7/1383	16/18866	7,10524690169713e-05	0,00496139215753074	0,00446905718053465	5080/6095/1745/4825/5468/64321/26038	7
GO:0045666	BP	positive regulation of neuron differentiation	49/1383	380/18866	7,9790696615371e-05	0,00550361195190901	0,00495747075248261	29993/147040/9699/27/6664/57498/22906/4137/627/79191/4919/2290/3169/1745/221914/1826/22941/22849/4825/9353/59284/3232/4821/2260/4914/127833/4803/7077/116/5914/2909/2242/55079/54606/7474/57118/90527/8322/8437/6857/652/8837/2803/5649/1453/23011/9181/5915/4681	49
GO:0042391	BP	regulation of membrane potential	55/1383	443/18866	8,47039022202127e-05	0,00577211169828341	0,00519932640134216	2562/10021/66000/2899/2273/9699/57555/885/27094/1739/4137/63895/1020/627/3753/857/266743/30819/9378/22941/6863/3778/2567/8506/254263/1269/610/4092/2902/10052/116/3747/8913/22953/388591/27068/219736/54207/9294/6717/1141/22997/4734/5590/4719/1824/9780/665/5649/3784/2550/9498/149111/57030/154	55
GO:0001754	BP	eye photoreceptor cell differentiation	12/1383	46/18866	8,58965233538147e-05	0,00578369923915686	0,00520976407308851	5080/1735/83552/23287/1826/7287/4647/23322/7068/7070/57096/118427	12
GO:0071560	BP	cellular response to transforming growth factor beta stimulus	36/1383	252/18866	8,92430207623461e-05	0,00593833559331564	0,00534905536210223	4053/51701/6664/8425/407975/57178/51341/23089/94031/3622/857/3175/1745/10755/7316/203100/63976/4088/4092/114990/677/1149/7474/5138/2530/5654/128853/8837/56937/80326/5590/80310/5045/652991/4087/26060	36
GO:0090101	BP	negative regulation of transmembrane receptor protein serine/threonine kinase signaling pathway	23/1383	133/18866	9,56436847218252e-05	0,0062902404742633	0,00566603958449981	407975/51341/23089/94031/8646/857/3175/1745/7316/10468/203100/63976/4088/4092/114990/1149/7474/5654/56937/652991/91851/4087/4681	23
GO:0021516	BP	dorsal spinal cord development	8/1383	22/18866	0,000102979437846577	0,00669484713172688	0,0060304958158189	6886/644168/64211/219409/266727/2668/3975/8022	8
GO:0048665	BP	neuron fate specification	10/1383	34/18866	0,000111464087138175	0,00712081288677051	0,00641419161244124	5080/120237/3670/167826/3169/63950/4825/4821/8022/3110	10
GO:0001837	BP	epithelial to mesenchymal transition	25/1383	152/18866	0,000112435628976526	0,00712081288677051	0,00641419161244124	4487/3670/6910/84695/2295/8313/3169/4017/2253/2260/4088/80199/6934/4092/114990/7481/7474/8751/652/152007/4488/51384/4087/51094/51176	25
GO:0021846	BP	cell proliferation in forebrain	9/1383	28/18866	0,000114567534069328	0,00712081288677051	0,00641419161244124	5455/85458/10642/2018/2253/64211/2260/1638/5108	9
GO:0048596	BP	embryonic camera-type eye morphogenesis	9/1383	28/18866	0,000114567534069328	0,00712081288677051	0,00641419161244124	5080/5076/6664/2295/6670/7474/220/51384/6909	9
GO:0021510	BP	spinal cord development	20/1383	109/18866	0,00011589478655887	0,00712500992148878	0,00641797216184131	5080/6886/6664/120237/3670/167826/644168/8646/84695/7545/64211/4825/4821/219409/266727/2668/3975/8022/5649/3110	20
GO:0060411	BP	cardiac septum morphogenesis	16/1383	77/18866	0,000121500009856498	0,00738929092202529	0,00665602770464572	6664/407975/3670/6910/2253/9353/4092/5914/7481/7474/2535/652/4488/6909/2626/5915	16
GO:0035418	BP	protein localization to synapse	17/1383	85/18866	0,00012419111088569	0,00747260556563261	0,0067310747669288	57555/1739/2693/4137/1020/22883/23096/9378/59284/254263/5602/2902/1740/7474/55737/5590/5649	17
GO:0035136	BP	forelimb morphogenesis	11/1383	41/18866	0,000128078099189967	0,00762536556861528	0,00686867590115722	4487/6910/7021/2019/23322/27164/494470/340419/4488/8854/157506	11
GO:0042462	BP	eye photoreceptor cell development	10/1383	35/18866	0,000145872806880405	0,00850573810016051	0,00766168622139076	5080/1735/83552/7287/4647/23322/7068/7070/57096/118427	10
GO:0110111	BP	negative regulation of animal organ morphogenesis	10/1383	35/18866	0,000145872806880405	0,00850573810016051	0,00766168622139076	55294/2303/5076/1735/7474/7068/54880/652/340419/6909	10
GO:0098732	BP	macromolecule deacylation	20/1383	111/18866	0,000150155025283298	0,00857911327452685	0,00772778014008598	9759/140701/23309/83933/4137/3622/10014/9219/7349/8841/7920/9643/127018/11107/10129/9112/56271/10943/6907/55869	20
GO:0046530	BP	photoreceptor cell differentiation	14/1383	63/18866	0,000150164818631216	0,00857911327452685	0,00772778014008598	5080/1735/83552/23287/1745/1826/7287/4647/23322/7068/7070/57096/118427/92211	14
GO:0035116	BP	embryonic hindlimb morphogenesis	9/1383	29/18866	0,000155380727589419	0,00878833395245756	0,00791623917402936	4487/2778/2253/9496/23322/652/340419/4488/5915	9
GO:0001709	BP	cell fate determination	11/1383	42/18866	0,000162133948824219	0,00907950113415625	0,00817851289535402	5080/5076/3670/5396/2290/4821/55079/64321/652/89870/6909	11
GO:0031016	BP	pancreas development	16/1383	79/18866	0,000166815252140451	0,00913792319780795	0,00823113754883319	3481/5080/3670/3175/79971/4825/4821/6934/10232/7474/6009/123872/652/8854/4087/3110	16
GO:0030512	BP	negative regulation of transforming growth factor beta receptor signaling pathway	17/1383	87/18866	0,000167360546696102	0,00913792319780795	0,00823113754883319	407975/51341/23089/94031/857/3175/7316/203100/63976/4088/4092/114990/1149/5654/56937/652991/4087	17
GO:0021520	BP	spinal cord motor neuron cell fate specification	6/1383	13/18866	0,000168024047484446	0,00913792319780795	0,00823113754883319	5080/3670/167826/4825/8022/3110	6
GO:0072189	BP	ureter development	7/1383	18/18866	0,000173468367567603	0,0093441627329749	0,00841691126844311	5076/2018/64321/652/84445/3975/8854	7
GO:0021515	BP	cell differentiation in spinal cord	13/1383	57/18866	0,000194540513743704	0,0103803881673056	0,00935030870426543	5080/6886/120237/3670/167826/64211/4825/4821/219409/266727/3975/8022/3110	13
GO:0072001	BP	renal system development	39/1383	292/18866	0,000199139015824492	0,0105264511542367	0,0094818773889871	5455/2303/5076/1739/6664/627/79191/4609/2018/10413/2253/9353/7021/2260/170690/4088/4092/51057/23322/5914/7481/185/7474/64321/2650/65266/652/8837/8772/4072/84445/2668/3975/3227/80310/8854/4087/5915/157506	39
GO:0016049	BP	cell growth	58/1383	490/18866	0,000201953701396342	0,0105739517159673	0,00952466431647464	10235/5931/66000/4879/2273/9699/9564/55384/81621/4487/8425/54910/4137/1020/627/8314/10509/51193/2100/22883/10500/10516/6446/6790/1826/4825/9353/59284/7349/4323/4088/127833/4803/4092/136319/7481/5468/57521/185/7474/8751/64321/6049/8437/9166/6857/6494/116224/5590/2803/3320/2626/10611/400410/9355/51094/23011/51176	58
GO:0007631	BP	feeding behavior	19/1383	105/18866	0,00020535151305415	0,0105739517159673	0,00952466431647464	3061/885/2693/627/4886/4889/7349/2019/2902/79924/3358/10716/390259/7200/2744/222236/1141/55585/8811	19
GO:0001759	BP	organ induction	8/1383	24/18866	0,000207515671936415	0,0105739517159673	0,00952466431647464	140628/2253/2260/7481/7474/652/2668/3227	8
GO:0021871	BP	forebrain regionalization	8/1383	24/18866	0,000207515671936415	0,0105739517159673	0,00952466431647464	5080/63950/2018/2253/55079/652/3975/9355	8
GO:0060041	BP	retina development in camera-type eye	24/1383	150/18866	0,000235216072799071	0,0118784116763531	0,0106996784995066	4041/221935/5080/4628/5076/1735/7101/22803/83552/1745/1826/7287/7021/23322/2823/8322/5158/7068/7070/57096/3975/9355/57030/4867	24
GO:0048048	BP	embryonic eye morphogenesis	10/1383	37/18866	0,000241896406496795	0,0121076643818219	0,0109061817181601	5080/5076/6664/2295/6670/7474/220/51384/6909/5915	10
GO:0050768	BP	negative regulation of neurogenesis	39/1383	295/18866	0,000246256652816194	0,012217786213407	0,011005375804528	5080/85458/152330/6664/8831/3670/54910/1735/7101/4152/1020/627/79191/10509/11023/2290/10500/1745/4825/9353/4821/5780/6658/116/25791/10363/7431/55079/7474/23189/6049/7068/7070/6657/2672/9355/7025/9181/5108	39
GO:0021879	BP	forebrain neuron differentiation	12/1383	51/18866	0,000249067621454033	0,0122497953647305	0,0110342085843251	5080/23314/57178/2290/1745/2253/64211/9353/55079/7474/10716/27164	12
GO:0001558	BP	regulation of cell growth	51/1383	420/18866	0,000260138107533261	0,012683975312139	0,011425303452459	10235/5931/4879/2273/9699/9564/55384/81621/4487/8425/54910/4137/1020/627/8314/10509/51193/2100/22883/10500/10516/6446/1826/4825/9353/59284/7349/4323/4088/127833/4803/4092/136319/7481/5468/57521/185/7474/8751/64321/6049/8437/9166/6857/6494/116224/2803/400410/51094/23011/51176	51
GO:0021527	BP	spinal cord association neuron differentiation	6/1383	14/18866	0,000275820564168585	0,0133336847088677	0,0120105400861534	6886/64211/219409/266727/3975/8022	6
GO:0048732	BP	gland development	53/1383	443/18866	0,000287406468085963	0,0137760252838492	0,0124089857764145	4041/55294/3481/2113/5080/159296/4487/3670/6156/29842/3169/857/3175/6790/6670/326/79971/5308/2253/79152/3232/8379/2260/4088/2356/6658/23322/116/5914/3213/7481/2909/7474/220/219409/9133/5860/390259/123872/652/8837/8772/1969/6657/80326/4488/6909/8022/8854/4087/80004/51176/472	53
GO:0050808	BP	synapse organization	52/1383	433/18866	0,000297960141448776	0,0141618702523889	0,0127565421018317	23114/2562/221935/66000/4628/57555/5217/1739/10152/8831/285489/2693/4137/1020/627/22883/1007/266743/1826/9378/22941/63827/4914/2902/386724/2823/25791/57689/56098/9419/4593/1740/10810/7474/22953/8541/1287/266727/6620/1141/22997/55737/2668/4734/375790/5649/10611/56130/782/7534/9806/203068	52
GO:0003156	BP	regulation of animal organ formation	10/1383	38/18866	0,00030692487338089	0,0144663923653526	0,0130308455014343	140628/3670/6910/2253/2260/7481/7474/652/2668/3227	10
GO:0009953	BP	dorsal/ventral pattern formation	17/1383	92/18866	0,000336751506067046	0,015659431749088	0,0141054957317028	5080/120237/8646/2290/3169/2253/4825/4821/2019/344022/652/3975/8022/4087/9355/4681/80319	17
GO:0021915	BP	neural tube development	25/1383	163/18866	0,000343894366813197	0,015659431749088	0,0141054957317028	5080/5076/6664/6788/54910/8646/7798/3169/2253/2019/80199/23322/5914/2909/677/7474/64321/2535/79977/652/1969/11019/8854/9355/6046	25
GO:0021987	BP	cerebral cortex development	20/1383	118/18866	0,000350346925454478	0,015659431749088	0,0141054957317028	5455/5080/85458/22911/93986/57178/7101/1020/23224/2290/63950/2018/9353/221692/317762/2902/10716/5079/5649/9355	20
GO:1904888	BP	cranial skeletal system development	14/1383	68/18866	0,000350772806591559	0,015659431749088	0,0141054957317028	2303/2778/6913/5396/2253/4323/4088/79977/652/5079/3975/4488/4087/157506	14
GO:0090288	BP	negative regulation of cellular response to growth factor stimulus	27/1383	182/18866	0,000352340520629089	0,015659431749088	0,0141054957317028	407975/51341/23089/94031/8646/857/3175/1745/7316/9353/203100/63976/4088/80199/4092/114990/1149/7474/5654/8837/56937/2817/4734/652991/91851/4087/4681	27
GO:0033555	BP	multicellular organismal response to stress	15/1383	76/18866	0,000354806088248342	0,015659431749088	0,0141054957317028	64856/885/6530/7101/627/824/6863/7349/4914/116/116372/3358/4862/22953/5649	15
GO:0007611	BP	learning or memory	35/1383	260/18866	0,000355592599506166	0,015659431749088	0,0141054957317028	885/9369/4908/93986/5803/8831/2693/4137/1020/627/266743/1816/6446/109/9378/22941/6863/107/22849/7349/4914/2019/4803/2902/342371/4593/10716/84630/54207/2237/1141/5590/5649/8811/57030	35
GO:0097106	BP	postsynaptic density organization	9/1383	32/18866	0,000356216391920643	0,015659431749088	0,0141054957317028	66000/57555/1739/8831/9378/22941/9419/1740/5649	9
GO:0017015	BP	regulation of transforming growth factor beta receptor signaling pathway	21/1383	127/18866	0,000357154649157063	0,015659431749088	0,0141054957317028	6664/8425/407975/51341/23089/94031/3622/857/3175/10755/7316/203100/63976/4088/4092/114990/1149/5654/56937/652991/4087	21
GO:0001764	BP	neuron migration	25/1383	164/18866	0,000378084864317631	0,0163776263335579	0,0147524215466427	5080/4628/885/23314/57178/167826/1020/644168/11023/2290/10752/4825/221692/1951/2260/2823/55079/266727/89796/3975/4147/5649/29967/9181/5108	25
GO:0007179	BP	transforming growth factor beta receptor signaling pathway	29/1383	202/18866	0,0003811874727488	0,0163776263335579	0,0147524215466427	4053/51701/6664/8425/407975/57178/51341/23089/94031/3622/857/3175/10755/7316/203100/63976/4088/4092/114990/1149/2530/5654/128853/56937/5590/5045/652991/4087/26060	29
GO:0002068	BP	glandular epithelial cell development	8/1383	26/18866	0,000386307283090563	0,0163776263335579	0,0147524215466427	5080/4825/4821/5914/7474/6009/652/5915	8
GO:0021877	BP	forebrain neuron fate commitment	5/1383	10/18866	0,000387534747513324	0,0163776263335579	0,0147524215466427	5080/23314/1745/55079/10716	5
GO:0030509	BP	BMP signaling pathway	24/1383	155/18866	0,000388013070844548	0,0163776263335579	0,0147524215466427	11167/4487/6664/94031/8646/1745/55512/10468/7021/4088/4092/7474/5654/652/494470/353500/4488/2626/652991/2657/91851/4087/4681/51176	24
GO:0007422	BP	peripheral nervous system development	15/1383	77/18866	0,000411251107214114	0,0172298982400224	0,015520119757632	23114/64398/861/6526/4908/3670/1020/627/79152/8506/60484/1960/4803/2817/2668	15
GO:0001822	BP	kidney development	37/1383	283/18866	0,000435472215780618	0,0180265165716375	0,0162376870778541	5455/2303/5076/1739/6664/627/79191/4609/10413/2253/9353/7021/2260/170690/4088/4092/51057/23322/5914/7481/185/64321/2650/65266/652/8837/8772/4072/84445/2668/3975/3227/80310/8854/4087/5915/157506	37
GO:0055123	BP	digestive system development	23/1383	147/18866	0,000436639457269155	0,0180265165716375	0,0162376870778541	3481/159296/6664/140628/6522/2295/388389/79971/10413/4821/4088/51057/7481/7474/64321/123872/652/6909/2626/8854/4087/5915/286451	23
GO:0010464	BP	regulation of mesenchymal cell proliferation	9/1383	33/18866	0,000458232330451846	0,0186200877963528	0,0167723563117598	4041/93986/5396/8646/4609/2260/7481/7474/652	9
GO:2001257	BP	regulation of cation channel activity	27/1383	185/18866	0,000458687295855745	0,0186200877963528	0,0167723563117598	7114/6844/57555/5031/1739/1020/1394/6236/3753/54800/857/30819/22941/59284/254263/2902/3747/1740/388591/29979/6717/56704/5649/8811/149111/782/154	27
GO:0042472	BP	inner ear morphogenesis	18/1383	103/18866	0,000464185357016575	0,0186200877963528	0,0167723563117598	55084/5076/5396/2290/7545/286262/5013/2253/4647/29/2260/51057/7474/11078/2535/220/219736/161497	18
GO:0048709	BP	oligodendrocyte differentiation	18/1383	103/18866	0,000464185357016575	0,0186200877963528	0,0167723563117598	443/5080/10100/6664/5803/83933/1020/118738/1745/4825/79152/4821/8506/5468/10810/6009/27242/56978	18
GO:0009187	BP	cyclic nucleotide metabolic process	10/1383	40/18866	0,000481126301458614	0,0191637349369713	0,0172620555897679	4879/6095/2977/5150/5152/55811/109/107/5138/1969	10
GO:1902473	BP	regulation of protein localization to synapse	8/1383	27/18866	0,000513964385773997	0,0203285494121519	0,0183112817603691	57555/1739/2693/4137/23096/254263/7474/5590	8
GO:2000678	BP	negative regulation of transcription regulatory region DNA binding	7/1383	21/18866	0,000521434807713491	0,0204808005029688	0,0184484244834305	7114/55294/4487/6664/6717/4488/9355	7
GO:0071772	BP	response to BMP	25/1383	168/18866	0,00054656624081212	0,0210412944621036	0,0189532988157116	11167/4487/6664/140628/94031/8646/1745/55512/10468/7021/4088/4092/7474/5654/652/494470/353500/4488/2626/652991/2657/91851/4087/4681/51176	25
GO:0071773	BP	cellular response to BMP stimulus	25/1383	168/18866	0,00054656624081212	0,0210412944621036	0,0189532988157116	11167/4487/6664/140628/94031/8646/1745/55512/10468/7021/4088/4092/7474/5654/652/494470/353500/4488/2626/652991/2657/91851/4087/4681/51176	25
GO:0051090	BP	regulation of DNA-binding transcription factor activity	53/1383	455/18866	0,000546865326366554	0,0210412944621036	0,0189532988157116	4041/7114/9759/5987/10211/23118/59307/1611/6788/51341/2100/10616/4919/3169/857/6446/10014/55502/7316/107/23085/4869/4825/4808/4821/9208/4914/4088/6934/5602/4092/5579/8887/136319/5468/9447/7474/57118/51360/2535/8322/89870/8837/85363/8553/6717/84433/5590/4488/5649/2672/9181/56919	53
GO:0007062	BP	sister chromatid cohesion	13/1383	63/18866	0,000551511304022562	0,0210766752402136	0,0189851686448734	55294/5885/23137/8313/10734/699/150280/9126/91272/27127/2237/10274/55869	13
GO:0048839	BP	inner ear development	28/1383	197/18866	0,000560771095111141	0,0212867202278431	0,0191743701896003	2562/55084/5076/627/5396/4919/2290/114902/7545/286262/5013/2253/4647/29/2260/51057/23322/7474/11078/2535/220/219736/652/6657/890/8022/3784/161497	28
GO:0042220	BP	response to cocaine	11/1383	48/18866	0,000569992211144093	0,0213501718293443	0,0192315252836348	221935/4152/1020/1816/10014/9343/1788/3329/8772/1141/890	11
GO:0042461	BP	photoreceptor cell development	11/1383	48/18866	0,000569992211144093	0,0213501718293443	0,0192315252836348	5080/1735/83552/7287/4647/23322/7068/7070/57096/118427/92211	11
GO:0007616	BP	long-term memory	9/1383	34/18866	0,000583068898044767	0,0215544946885046	0,0194155725251921	266743/6446/6863/107/22849/2902/5590/5649/57030	9
GO:0099084	BP	postsynaptic specialization organization	9/1383	34/18866	0,000583068898044767	0,0215544946885046	0,0194155725251921	66000/57555/1739/8831/9378/22941/9419/1740/5649	9
GO:1902414	BP	protein localization to cell junction	18/1383	105/18866	0,000589427624099839	0,0216480691033032	0,0194998612484157	57555/143098/1739/2693/4137/1020/22883/23096/9378/59284/254263/5602/2902/1740/7474/55737/5590/5649	18
GO:0003279	BP	cardiac septum development	19/1383	114/18866	0,000604092765969817	0,0220256554464018	0,019839978478483	4628/6664/407975/3670/6910/7798/2253/9353/4092/5914/7481/7474/5138/2535/652/4488/6909/2626/5915	19
GO:0007626	BP	locomotory behavior	28/1383	198/18866	0,000608495596857787	0,0220256554464018	0,019839978478483	55084/57555/22911/6886/463/10499/2693/2571/4886/7545/10752/1826/321/4986/2019/2902/3358/55079/23551/8322/220/390259/1141/55737/2668/5649/9112/56172	28
GO:0051961	BP	negative regulation of nervous system development	40/1383	319/18866	0,000611391072327633	0,0220256554464018	0,019839978478483	5080/85458/152330/6664/8831/3670/54910/1735/7101/4152/1020/627/79191/10509/11023/2290/10500/1745/4825/9353/4821/5780/6658/116/25791/10363/7431/55079/7474/23189/6049/7068/27242/7070/6657/2672/9355/7025/9181/5108	40
GO:0006476	BP	protein deacetylation	17/1383	97/18866	0,000637924901326032	0,0228360964677218	0,0205699968182411	9759/23309/83933/4137/3622/10014/9219/7349/8841/9643/11107/10129/9112/56271/10943/6907/55869	17
GO:0003139	BP	secondary heart field specification	5/1383	11/18866	0,000667624901524028	0,0237489713397478	0,0213922841666752	3670/8313/7481/7474/652	5
GO:2000463	BP	positive regulation of excitatory postsynaptic potential	8/1383	28/18866	0,000673723126455864	0,0238161125202148	0,0214527627108315	9699/57555/9378/22941/2902/5590/5649/154	8
GO:1901888	BP	regulation of cell junction assembly	28/1383	200/18866	0,000714734380978234	0,025108929557844	0,0226172893359572	861/57555/10211/4641/2693/627/22883/865/857/9378/5908/4323/4914/4088/51057/2902/386724/79834/4593/7474/7070/266727/1141/1969/55737/375790/10611/4867	28
GO:0010001	BP	glial cell differentiation	31/1383	230/18866	0,000735295575772817	0,0256303434687373	0,0230869616594745	64398/443/5080/10100/6886/5076/6664/5803/83933/7101/4137/4152/1020/4919/118738/1745/4825/79152/4821/8506/5468/7431/10810/84630/6009/27242/2817/6657/5649/56978/51176	31
GO:0035601	BP	protein deacylation	18/1383	107/18866	0,000742719414720271	0,0256303434687373	0,0230869616594745	9759/23309/83933/4137/3622/10014/9219/7349/8841/9643/127018/11107/10129/9112/56271/10943/6907/55869	18
GO:0007498	BP	mesoderm development	21/1383	134/18866	0,000743171203831845	0,0256303434687373	0,0230869616594745	2303/6886/5076/4232/79191/8646/79971/10413/2253/2260/4088/7481/677/7474/652/89870/1969/3975/4087/9355/51176	21
GO:0050890	BP	cognition	38/1383	302/18866	0,000773037469072397	0,0264987874246877	0,0238692271152179	55084/885/9369/4908/93986/5803/8831/2693/4137/1020/627/266743/1816/10752/6446/109/9378/22941/6863/107/22849/7349/4914/2019/4803/2902/342371/4593/10716/84630/3973/54207/2237/1141/5590/5649/8811/57030	38
GO:0060078	BP	regulation of postsynaptic membrane potential	22/1383	144/18866	0,00080029385252028	0,0272678435533416	0,0245619673189484	2562/66000/2899/9699/57555/1020/627/266743/9378/22941/2567/2902/116/22953/9294/1141/22997/5590/5649/2550/57030/154	22
GO:0050954	BP	sensory perception of mechanical stimulus	25/1383	173/18866	0,000846836899805605	0,0286808952413204	0,0258347973215199	2562/55084/64699/63895/644168/4919/3753/286262/5077/4647/26520/7349/2260/4914/2917/11078/8322/22953/7068/491/1141/80204/3784/161497/6907	25
GO:0003128	BP	heart field specification	6/1383	17/18866	0,000938773456842236	0,0314183590053236	0,02830061370985	140628/3670/8313/7481/7474/652	6
GO:0043649	BP	dicarboxylic acid catabolic process	6/1383	17/18866	0,000938773456842236	0,0314183590053236	0,02830061370985	443/2571/122970/2572/2747/2752	6
GO:2000027	BP	regulation of animal organ morphogenesis	33/1383	254/18866	0,000963884926211904	0,0320690184862031	0,0288867061477747	55294/2303/4487/5076/93986/140628/3670/1735/627/6910/4919/4609/2253/1951/2260/7481/7474/4300/55966/2535/8322/388591/219736/7068/54880/652/8837/2668/80326/3975/340419/3227/6909	33
GO:0043583	BP	ear development	30/1383	224/18866	0,000984449028210407	0,0322742258193333	0,0290715500940917	2562/55084/4487/5076/627/5396/4919/2290/114902/7545/286262/5013/2253/4647/29/2260/51057/23322/7474/11078/2535/220/219736/652/6657/890/8022/3784/161497/157506	30
GO:0001707	BP	mesoderm formation	14/1383	75/18866	0,000986820603210682	0,0322742258193333	0,0290715500940917	2303/6886/5076/8646/79971/2260/4088/7481/7474/652/89870/1969/4087/51176	14
GO:0034329	BP	cell junction assembly	50/1383	434/18866	0,000987171334290076	0,0322742258193333	0,0290715500940917	23114/64398/2562/861/221935/57555/10211/4641/143098/1739/2693/1020/627/22883/865/1007/857/266743/1826/9378/22941/8506/5908/4323/4914/4088/4092/51057/2902/10052/386724/2823/79834/5317/7481/4593/7474/5339/79977/7070/266727/1141/1969/55737/375790/10611/56130/4867/421/9806	50
GO:0045665	BP	negative regulation of neuron differentiation	30/1383	225/18866	0,00105821276898262	0,034031837163985	0,0306547479851275	5080/85458/152330/8831/3670/54910/1735/7101/1020/79191/10509/2290/10500/1745/9353/4821/5780/6658/25791/10363/7431/55079/7474/23189/6049/7068/7070/6657/2672/7025	30
GO:0021702	BP	cerebellar Purkinje cell differentiation	5/1383	12/18866	0,00107559923071368	0,034031837163985	0,0306547479851275	6095/23287/64211/3975/8925	5
GO:0038180	BP	nerve growth factor signaling pathway	5/1383	12/18866	0,00107559923071368	0,034031837163985	0,0306547479851275	4908/57498/627/4914/4803	5
GO:0060900	BP	embryonic camera-type eye formation	5/1383	12/18866	0,00107559923071368	0,034031837163985	0,0306547479851275	5076/6664/7474/220/51384	5
GO:0010463	BP	mesenchymal cell proliferation	10/1383	44/18866	0,00107703303613036	0,034031837163985	0,0306547479851275	4041/4487/93986/5396/8646/4609/2260/7481/7474/652	10
GO:1903539	BP	protein localization to postsynaptic membrane	10/1383	44/18866	0,00107703303613036	0,034031837163985	0,0306547479851275	1739/2693/22883/23096/59284/5602/2902/1740/55737/5590	10
GO:0048265	BP	response to pain	8/1383	30/18866	0,00111248004562136	0,0349106109573308	0,0314463182151197	64856/6530/824/6863/7349/4914/22953/5649	8
GO:0000819	BP	sister chromatid segregation	27/1383	196/18866	0,0011277742356124	0,0349106109573308	0,0314463182151197	55294/23397/5885/148479/7273/23137/8881/8313/10734/29127/699/8379/150280/9126/91272/27127/348654/49856/51529/2237/25936/10274/84101/4085/55869/29781/472	27
GO:0060560	BP	developmental growth involved in morphogenesis	31/1383	236/18866	0,00112932233042972	0,0349106109573308	0,0314463182151197	66000/9699/54910/4137/1020/627/10509/10500/6790/1826/10413/4825/9353/59284/127833/4803/7481/7474/6049/8437/6857/652/84445/3975/5590/2803/3320/6909/9355/23011/157506	31
GO:0072091	BP	regulation of stem cell proliferation	14/1383	76/18866	0,00112953355820218	0,0349106109573308	0,0314463182151197	5080/6664/7101/627/11023/2290/63950/10413/342371/677/64321/5788/1638/4072	14
GO:0032535	BP	regulation of cellular component size	45/1383	383/18866	0,00115909760438564	0,0356296524478543	0,0320940068948885	7114/114908/5987/1185/4641/5217/56262/1739/10152/54910/4137/1020/627/10509/84561/23038/10500/1826/3778/4825/9353/55971/7349/6711/4803/5341/50809/3575/136319/345456/822/2909/10092/57521/10810/7474/11078/23189/91663/5921/6049/2803/8799/23011/5499	45
GO:0001655	BP	urogenital system development	40/1383	330/18866	0,00118215794980911	0,036142083049299	0,0325555873517842	5455/2303/5076/1739/6664/627/79191/3169/4609/2018/10413/2253/9353/7021/2260/170690/4088/4092/51057/23322/5914/7481/185/7474/64321/2650/65266/652/8837/8772/4072/84445/2668/3975/3227/80310/8854/4087/5915/157506	40
GO:0030198	BP	extracellular matrix organization	46/1383	395/18866	0,0012356624072787	0,0375747665353137	0,0338461010256305	80781/64856/2303/2113/10211/81621/64147/7148/80274/7101/9644/3679/84695/2295/169044/857/10516/4017/824/55512/63827/124056/60484/4323/170690/4088/169611/3038/7077/342371/2199/8510/8751/89932/5654/8174/8038/1287/1463/8837/1298/375790/5045/3696/7982/9806	46
GO:0007613	BP	memory	19/1383	121/18866	0,00126823886057983	0,0377474013351934	0,0340016047164327	885/4908/4137/627/266743/6446/6863/107/22849/4803/2902/342371/4593/54207/2237/1141/5590/5649/57030	19
GO:0021511	BP	spinal cord patterning	7/1383	24/18866	0,00127777519448161	0,0377474013351934	0,0340016047164327	5080/120237/8646/4825/4821/8022/5649	7
GO:0021697	BP	cerebellar cortex formation	7/1383	24/18866	0,00127777519448161	0,0377474013351934	0,0340016047164327	6095/1020/23287/64211/136319/3975/8925	7
GO:0062009	BP	secondary palate development	7/1383	24/18866	0,00127777519448161	0,0377474013351934	0,0340016047164327	1739/6664/7481/7474/2535/4087/51176	7
GO:0099565	BP	chemical synaptic transmission, postsynaptic	18/1383	112/18866	0,00128251912956978	0,0377474013351934	0,0340016047164327	2562/66000/9699/57555/1020/627/266743/9378/22941/2902/22953/9294/1141/22997/5590/5649/57030/154	18
GO:0048332	BP	mesoderm morphogenesis	14/1383	77/18866	0,00128915188064398	0,0377474013351934	0,0340016047164327	2303/6886/5076/8646/79971/2260/4088/7481/7474/652/89870/1969/4087/51176	14
GO:0003197	BP	endocardial cushion development	10/1383	45/18866	0,00129512802981339	0,0377474013351934	0,0340016047164327	4487/140628/3670/6910/2253/652/4734/4488/6909/2626	10
GO:0098815	BP	modulation of excitatory postsynaptic potential	10/1383	45/18866	0,00129512802981339	0,0377474013351934	0,0340016047164327	66000/9699/57555/9378/22941/2902/9294/5590/5649/154	10
GO:0043062	BP	extracellular structure organization	46/1383	396/18866	0,00130150582286631	0,0377474013351934	0,0340016047164327	80781/64856/2303/2113/10211/81621/64147/7148/80274/7101/9644/3679/84695/2295/169044/857/10516/4017/824/55512/63827/124056/60484/4323/170690/4088/169611/3038/7077/342371/2199/8510/8751/89932/5654/8174/8038/1287/1463/8837/1298/375790/5045/3696/7982/9806	46
GO:0007517	BP	muscle organ development	47/1383	407/18866	0,00131200471045804	0,0377474013351934	0,0340016047164327	9759/2303/2248/2273/10211/4487/463/93986/6664/407975/6300/3670/5463/1020/7273/8910/6910/11023/3679/59269/857/63950/5077/10413/2253/7134/1960/2260/4088/4092/26263/136319/7474/2535/22953/652/26576/8837/6717/5079/2817/27230/6909/56704/2218/51176/221937	47
GO:0051092	BP	positive regulation of NF-kappaB transcription factor activity	23/1383	159/18866	0,00131960565854905	0,0377474013351934	0,0340016047164327	5987/10211/23118/51341/10616/4919/857/7316/23085/4869/9208/4914/5579/136319/9447/7474/89870/8837/85363/84433/5590/9181/56919	23
GO:0060080	BP	inhibitory postsynaptic potential	6/1383	18/18866	0,00132142600147954	0,0377474013351934	0,0340016047164327	2562/9699/57555/627/266743/22997	6
GO:0003206	BP	cardiac chamber morphogenesis	20/1383	131/18866	0,00136585289457748	0,0386346737889366	0,0348008302572867	2303/6664/407975/3670/6910/4889/2253/9353/7134/4092/5914/7481/7474/2535/79977/652/4488/6909/2626/5915	20
GO:0007193	BP	adenylate cyclase-inhibiting G protein-coupled receptor signaling pathway	15/1383	86/18866	0,00136614829522407	0,0386346737889366	0,0348008302572867	2899/2914/4886/3361/2774/109/107/4986/2918/2917/5996/5138/2912/1131/2550	15
GO:0007223	BP	Wnt signaling pathway, calcium modulating pathway	9/1383	38/18866	0,00138941073895215	0,0390970504453402	0,0352173237838618	51701/6934/7481/7474/2535/8322/5158/4772/51176	9
GO:0021799	BP	cerebral cortex radially oriented cell migration	8/1383	31/18866	0,00140423540262793	0,0391097448756306	0,0352287585048113	5455/85458/57178/7101/1020/23224/2290/5649	8
GO:0060914	BP	heart formation	8/1383	31/18866	0,00140423540262793	0,0391097448756306	0,0352287585048113	140628/3670/6910/8313/7481/7474/64321/652	8
GO:0051668	BP	localization within membrane	16/1383	95/18866	0,00141060607401497	0,0391097448756306	0,0352287585048113	10802/1739/8831/1020/975/9378/59284/254263/23180/4593/1740/5788/8174/7070/375790/5649	16
GO:0032409	BP	regulation of transporter activity	36/1383	291/18866	0,0014183922541611	0,0391337882416351	0,0352504159699088	7114/6844/2273/57555/5031/1739/5444/1020/1394/6236/3753/54800/23072/857/30819/6446/22941/59284/254263/10105/2902/5468/3747/1740/388591/65266/29979/6717/1131/4734/56704/5649/8811/149111/782/154	36
GO:0016331	BP	morphogenesis of embryonic epithelium	22/1383	151/18866	0,00151216067177746	0,0415183532018122	0,0373983528431421	5076/6664/6788/54910/79191/7798/2253/80199/5914/2909/7474/2535/220/79977/652/2668/51384/11019/8854/9355/6046/157506	22
GO:0009755	BP	hormone-mediated signaling pathway	27/1383	200/18866	0,00152630950067972	0,0417043794002148	0,0375659190607161	861/8031/27086/57178/3670/2693/7101/51341/2100/1394/865/3169/10413/5914/5468/6049/7200/7068/3973/652/29966/56937/4734/51094/5915/26060/51176	27
GO:0042471	BP	ear morphogenesis	19/1383	123/18866	0,00154586733838442	0,0420357003168378	0,0378643619320879	55084/4487/5076/5396/2290/7545/286262/5013/2253/4647/29/2260/51057/7474/11078/2535/220/219736/161497	19
GO:0021694	BP	cerebellar Purkinje cell layer formation	5/1383	13/18866	0,00164283372023195	0,0436059254452771	0,0392787685467023	6095/23287/64211/3975/8925	5
GO:0021978	BP	telencephalon regionalization	5/1383	13/18866	0,00164283372023195	0,0436059254452771	0,0392787685467023	5080/63950/2018/652/9355	5
GO:0007605	BP	sensory perception of sound	22/1383	152/18866	0,00164856327488853	0,0436059254452771	0,0392787685467023	2562/55084/64699/4919/3753/286262/5077/4647/26520/7349/2260/2917/11078/8322/22953/7068/491/1141/80204/3784/161497/6907	22
GO:0002053	BP	positive regulation of mesenchymal cell proliferation	7/1383	25/18866	0,00166359195651861	0,0436059254452771	0,0392787685467023	4041/93986/5396/8646/4609/2260/7474	7
GO:2000311	BP	regulation of AMPA receptor activity	7/1383	25/18866	0,00166359195651861	0,0436059254452771	0,0392787685467023	57555/22941/59284/254263/5649/149111/154	7
GO:0007492	BP	endoderm development	14/1383	79/18866	0,00166528993921143	0,0436059254452771	0,0392787685467023	2186/3679/3175/2253/4323/4088/677/64321/652/6657/3975/3227/2626/4087	14
GO:0016575	BP	histone deacetylation	14/1383	79/18866	0,00166528993921143	0,0436059254452771	0,0392787685467023	9759/23309/83933/3622/10014/9219/7349/8841/9643/11107/9112/10943/6907/55869	14
GO:0099601	BP	regulation of neurotransmitter receptor activity	14/1383	79/18866	0,00166528993921143	0,0436059254452771	0,0392787685467023	57555/1739/1020/54800/22941/59284/22839/254263/130574/2902/1740/5649/149111/154	14
GO:0050806	BP	positive regulation of synaptic transmission	24/1383	172/18866	0,00173314175569183	0,045173501245129	0,0406907887341667	6844/9699/57555/10211/7101/1020/22883/10590/9378/22941/6863/107/59284/4914/2902/116/2752/6857/1141/22997/5590/5649/9498/154	24
GO:0051968	BP	positive regulation of synaptic transmission, glutamatergic	8/1383	32/18866	0,00175357507286369	0,045496424826225	0,0409816675647527	57555/9378/22941/59284/4914/116/2752/5649	8
GO:0015800	BP	acidic amino acid transport	13/1383	71/18866	0,00177357467385306	0,0458051979694653	0,0412598001511598	6844/56262/885/627/4889/10755/2917/2912/7200/8541/2744/6857/57030	13
GO:0000118	CC	histone deacetylase complex	17/1412	77/19559	2,74717281625926e-05	0,0102766961444488	0,00946537802778176	9759/5931/23309/1108/6886/23314/83933/2122/51341/3622/10014/9219/8841/26038/9112/6907/55869	17
GO:0005667	CC	transcription regulator complex	53/1412	413/19559	3,17181979766937e-05	0,0102766961444488	0,00946537802778176	6874/9759/861/5931/2113/1108/333929/6886/463/23314/51341/6913/3622/2295/865/266743/55502/6688/6670/54457/9219/10413/5308/2968/4808/7005/8841/63976/4088/6934/4092/1875/3238/5468/4862/64321/80155/390259/26038/51085/6657/3975/6909/8022/2626/652991/2672/4087/7090/9112/6907/4772/51176	53
GO:0097060	CC	synaptic membrane	48/1412	387/19559	0,00016837529955596	0,0363690647040873	0,0334978227537646	2562/3838/134957/2899/9699/57555/83590/6530/1739/54910/2693/80863/22883/3361/1007/9627/9378/22941/107/23085/3778/2567/59284/8506/254263/440073/2572/2902/2823/57689/3747/2917/4593/1740/5138/2912/286/1759/491/6857/1141/6538/22997/1131/2550/374291/9498/149111	48
GO:0098978	CC	glutamatergic synapse	45/1412	361/19559	0,000236963411141228	0,038388072604879	0,0353574352939675	3838/2899/4628/10211/5217/1739/8831/2693/1020/80863/22883/140735/10755/9378/107/63827/59284/6711/22839/254263/50632/29/5602/2902/84249/2823/57689/8224/1740/10810/7474/8322/1759/491/8541/6857/55737/1131/4734/8526/5590/9498/7534/5499/9181	45
GO:0016581	CC	NuRD complex	6/1412	15/19559	0,000397002858881309	0,0416721093470343	0,0383822059775316	5931/1108/51341/9219/26038/9112	6
GO:0090545	CC	CHD-type complex	6/1412	15/19559	0,000397002858881309	0,0416721093470343	0,0383822059775316	5931/1108/51341/9219/26038/9112	6
GO:0099572	CC	postsynaptic specialization	44/1412	361/19559	0,000450161675045124	0,0416721093470343	0,0383822059775316	3838/66000/57555/1739/8831/54910/1020/9743/6156/22883/3361/140735/22941/107/22849/59284/6711/22839/254263/29/440073/64506/4134/2902/57689/9419/8224/1740/1266/9045/6009/1759/491/9829/1141/22997/55737/1131/5590/23229/10611/6230/9181/6129	44
GO:0001227	MF	DNA-binding transcription repressor activity, RNA polymerase II-specific	49/1380	335/18352	5,36603067412927e-06	0,00295514898175186	0,00289572971350548	5080/5325/333929/4487/23619/5178/463/93986/3428/50805/5463/7101/79191/51341/7730/6913/11023/5396/7707/255877/4609/6688/6670/2018/58492/4825/9208/8187/2120/2019/344022/5468/3090/55079/219409/11063/55509/27022/8553/51085/126070/4488/6909/11107/2672/79618/7025/221937/6304	49
GO:0001217	MF	DNA-binding transcription repressor activity	49/1380	336/18352	5,8344501120471e-06	0,00295514898175186	0,00289572971350548	5080/5325/333929/4487/23619/5178/463/93986/3428/50805/5463/7101/79191/51341/7730/6913/11023/5396/7707/255877/4609/6688/6670/2018/58492/4825/9208/8187/2120/2019/344022/5468/3090/55079/219409/11063/55509/27022/8553/51085/126070/4488/6909/11107/2672/79618/7025/221937/6304	49
GO:0033613	MF	activating transcription factor binding	18/1380	80/18352	2,1099048916512e-05	0,00712444551747556	0,00698119408009503	9759/3670/51341/5396/4609/5308/4869/4808/3233/3221/63976/4088/5468/2551/8553/2626/4087/56919	18
GO:0099106	MF	ion channel regulator activity	22/1380	119/18352	6,98491504317521e-05	0,0176892973468412	0,0173336181203006	9482/6526/27094/1739/6236/3753/857/30819/6446/9378/59284/5579/1804/2912/5921/65266/57628/6717/4734/5590/10490/154	22
GO:0015459	MF	potassium channel regulator activity	13/1380	53/18352	0,000113824885312782	0,0230609217643696	0,022597235126306	6526/27094/1739/3753/857/30819/6446/1804/5921/65266/57628/5590/154	13
GO:0016247	MF	channel regulator activity	24/1380	148/18352	0,000278248788251132	0,0469776704163994	0,0460330890036522	9482/6526/27094/1739/64699/6236/3753/857/30819/6446/9378/59284/5579/1804/2912/5921/65266/57628/6717/4734/5590/10490/149111/154	24
